# Supplementary material for: Functional Modules, Structural Topology, and Optimal Activity in Metabolic Networks
Source: PLoS Comput Biol. 2012 Oct 11;8(10):e1002720. doi: 10.1371/journal.pcbi.1002720 (PMC3469419; doi:10.1371/journal.pcbi.1002720)
Supplement: Dataset S2 — Metabolites integrating each structural module. This table contains information of the metabolites forming each one of the nine structural modules identified by the topological criteria used in the main text. (XLSX) [file pcbi.1002720.s002.xlsx]

## Sheet: Modules 1-9
Additional File 2. Metabolites integrating each structural module.
* Cnumber according wirth KEGG database.
** Detected through metabolome data.
*** Ration of metabolic abundance between nitrogen fixation (Bact) and Free-living conditions (FL).
° Detection in KEGG.
°° Specifc biological role in KEGG database.
Metabolites with a defined biological role and with a null ratio indicates those detected only in FL.
Metabolites detected only during bacterial nitrogen fixation were excluded in the analysis.
	Cnumber*	metabolome**	Ration(Bact/VL)***	KEGGbiolrole°	BiolRole°°
Module 1	C00559	FALSE	0	TRUE	Nucleic acids
	C00360	TRUE	1.4	TRUE	Nucleic acids
	C00672	FALSE	0	FALSE	--
	C05512	FALSE	0	FALSE	--
	C00362	FALSE	0	TRUE	Nucleic acids
	C00330	FALSE	0	TRUE	Nucleic acids
	C00881	FALSE	0	TRUE	Nucleic acids
	C00526	FALSE	0	TRUE	Nucleic acids
	C00239	TRUE	0.5	TRUE	Nucleic acids
	C00361	FALSE	0	TRUE	Nucleic acids
	C00286	TRUE	0	TRUE	Nucleic acids
	C03279	FALSE	0	FALSE	--
	C02376	FALSE	0	FALSE	--
	C00178	FALSE	0	TRUE	Nucleic acids
	C01346	FALSE	0	TRUE	Nucleic acids
	C00365	FALSE	0	TRUE	Nucleic acids
	C00460	FALSE	0	TRUE	Nucleic acids
	C00214	TRUE	1.9	TRUE	Nucleic acids
	C02642	TRUE	0.5	FALSE	--
	C00429	FALSE	0	FALSE	--
	C00106	TRUE	12	TRUE	Nucleic acids
	C00380	TRUE	3.8	TRUE	Nucleic acids
	C00299	TRUE	4.5	TRUE	Nucleic acids
	C00458	TRUE	0	TRUE	Nucleic acids
	C00705	TRUE	0	TRUE	Nucleic acids
	C00342	FALSE	0	FALSE	--
	C00112	TRUE	4.5	TRUE	Nucleic acids
	C00343	FALSE	0	FALSE	--
Module 2	C00147	TRUE	11	TRUE	Nucleic acids
	C00212	TRUE	6.1	TRUE	Nucleic acids
	C00019	TRUE	7.2	FALSE	--
	C02967	FALSE	0	FALSE	--
	C00021	TRUE	0.5	FALSE	--
	C00039	FALSE	0	FALSE	--
	C03539	FALSE	0	FALSE	--
	C00155	FALSE	0	TRUE	Peptides
	C00073	FALSE	0	TRUE	Peptides
	C00234	FALSE	0	FALSE	--
	C03294	FALSE	0	FALSE	--
	C03838	FALSE	0	FALSE	--
	C00440	FALSE	0	FALSE	--
	C02430	FALSE	0	FALSE	--
	C01647	FALSE	0	FALSE	--
	C00101	FALSE	0	FALSE	--
Module 3	C04691	FALSE	0	FALSE	--
	C00944	FALSE	0	FALSE	--
	C02637	FALSE	0	FALSE	--
	C00131	TRUE	0	TRUE	Nucleic acids
	C00631	TRUE	14	FALSE	--
	C00074	TRUE	2.4	FALSE	--
	C00691	FALSE	0	FALSE	--
	C00137	FALSE	0	FALSE	--
	C00024	TRUE	2.5	FALSE	--
	eico	FALSE	0	FALSE	--
	C01530	FALSE	0	TRUE	Lipids
	C00249	FALSE	0	TRUE	Lipids
	hpdca	FALSE	0	FALSE	--
	C00222	FALSE	0	FALSE	--
	C00940	FALSE	0	FALSE	--
	C00133	FALSE	0	TRUE	Peptides
	C00041	FALSE	0	TRUE	Peptides
	C00886	FALSE	0	FALSE	--
	C01635	FALSE	0	FALSE	--
	C03740	FALSE	0	FALSE	--
	C00206	TRUE	1.2	TRUE	Nucleic acids
	C03340	FALSE	0	FALSE	--
	C06010	FALSE	0	FALSE	--
	C00022	FALSE	0	FALSE	--
	C05125	FALSE	0	FALSE	--
	C00068	FALSE	0	FALSE	--
	C00158	TRUE	11	FALSE	--
	C00149	FALSE	0	FALSE	--
	C00036	FALSE	0	FALSE	--
Module 4	C00979	FALSE	0	FALSE	--
	C03492	FALSE	0	FALSE	--
	C04352	FALSE	0	FALSE	--
	C00097	FALSE	0	TRUE	Peptides
	C03125	FALSE	0	FALSE	--
	C01639	FALSE	0	FALSE	--
	C01077	FALSE	0	FALSE	--
	C02291	FALSE	0	FALSE	--
	C00283	FALSE	0	FALSE	--
	hs-	FALSE	0	FALSE	--
	C00033	FALSE	0	TRUE	Lipids
	C00164	FALSE	0	FALSE	--
	C01089	FALSE	0	FALSE	--
	C00042	TRUE	0.6	FALSE	--
	C00091	FALSE	0	FALSE	--
	C04272	FALSE	0	FALSE	--
	C02631	FALSE	0	FALSE	--
	C02504	TRUE	4.3	FALSE	--
	C00141	FALSE	0	FALSE	--
	C04411	FALSE	0	FALSE	--
	C00417	FALSE	0	FALSE	--
	C04546	FALSE	0	FALSE	--
	C00229	FALSE	0	FALSE	--
	apoACP	FALSE	0	FALSE	--
	C00882	FALSE	0	FALSE	--
	C03561	FALSE	0	FALSE	--
	C06143	FALSE	0	FALSE	--
	C00010	TRUE	0	FALSE	--
	C00054	FALSE	0	FALSE	--
	C00163	TRUE	0	TRUE	Lipids
	C00877	FALSE	0	FALSE	--
	C00136	FALSE	0	FALSE	--
	C01144	FALSE	0	FALSE	--
	C00332	FALSE	0	FALSE	--
	C00154	FALSE	0	FALSE	--
	C01944	FALSE	0	FALSE	--
	C01832	FALSE	0	FALSE	--
	C05274	FALSE	0	FALSE	--
	C02593	FALSE	0	FALSE	--
	C05270	FALSE	0	FALSE	--
	C03972	FALSE	0	FALSE	--
	C01134	FALSE	0	FALSE	--
	C04079	FALSE	0	FALSE	--
	C00831	FALSE	0	FALSE	--
	C06006	FALSE	0	FALSE	--
	C00109	FALSE	0	FALSE	--
	C01234	FALSE	0	FALSE	--
	C00072	FALSE	0	TRUE	Vitamins and cofactors
	C01326	FALSE	0	FALSE	--
	C00425	FALSE	0	FALSE	--
	ethy	FALSE	0	FALSE	--
	C01118	FALSE	0	FALSE	--
	C00441	FALSE	0	FALSE	--
	C00263	TRUE	1.8	TRUE	Peptides
	C01102	FALSE	0	FALSE	--
	C01419	FALSE	0	FALSE	--
	C00127	TRUE	0.09	FALSE	--
	C00051	TRUE	3.5	FALSE	--
	C00224	FALSE	0	FALSE	--
	C00059	FALSE	0	FALSE	--
	C00094	FALSE	0	FALSE	--
	C00430	FALSE	0	FALSE	--
	C00048	TRUE	0	FALSE	--
	C03508	FALSE	0	FALSE	--
	C00084	FALSE	0	FALSE	--
	C00188	FALSE	0	TRUE	Peptides
	C02992	FALSE	0	FALSE	--
	C01651	FALSE	0	FALSE	--
	C05519	FALSE	0	FALSE	--
	C00037	TRUE	1.7	TRUE	Peptides
	C01642	FALSE	0	FALSE	--
	C02412	FALSE	0	FALSE	--
	progly	FALSE	0	FALSE	--
Module 5	C00099	TRUE	2.4	TRUE	Peptides
	C00966	FALSE	0	FALSE	--
	C00522	FALSE	0	FALSE	--
	C00864	TRUE	0	TRUE	Vitamins and cofactors
	C00415	FALSE	0	FALSE	--
	C00364	TRUE	0.7	TRUE	Nucleic acids
	C00363	TRUE	1.6	TRUE	Nucleic acids
	C00459	TRUE	0	TRUE	Nucleic acids
	C00143	FALSE	0	FALSE	--
	C00475	TRUE	6.7	TRUE	Nucleic acids
	C00269	FALSE	0	FALSE	--
	C00055	TRUE	3.9	TRUE	Nucleic acids
	C00463	FALSE	0	FALSE	--
	C00350	FALSE	0	TRUE	Lipids
	C02737	FALSE	0	TRUE	Lipids
	C00065	FALSE	0	TRUE	Peptides
	C02553	FALSE	0	FALSE	--
	C01650	FALSE	0	FALSE	--
	C01652	FALSE	0	FALSE	--
	C03512	FALSE	0	FALSE	--
	C00078	FALSE	0	TRUE	Peptides
Module 6	C04677	TRUE	1.1	FALSE	--
	C04734	FALSE	0	FALSE	--
	C00063	TRUE	1.4	TRUE	Nucleic acids
	C00152	FALSE	0	TRUE	Peptides
	C00169	FALSE	0	FALSE	--
	C03373	FALSE	0	FALSE	--
	C04640	FALSE	0	FALSE	--
	C00064	FALSE	0	TRUE	Peptides
	C04666	FALSE	0	FALSE	--
	C00352	TRUE	0	FALSE	--
	C00108	TRUE	3.1	FALSE	--
	C03090	FALSE	0	FALSE	--
	C00906	FALSE	0	FALSE	--
	C03794	TRUE	4.6	FALSE	--
	C04494	FALSE	0	FALSE	--
	C00044	TRUE	2.8	TRUE	Nucleic acids
	C00035	TRUE	3.3	TRUE	Nucleic acids
	C01228	TRUE	12	FALSE	--
Module 7	C04236	FALSE	0	FALSE	--
	C00671	FALSE	0	FALSE	--
	C00233	FALSE	0	FALSE	--
	C00026	TRUE	8.9	FALSE	--
	C06002	FALSE	0	FALSE	--
	C01179	FALSE	0	FALSE	--
	C00166	FALSE	0	FALSE	--
	C01250	FALSE	0	FALSE	--
	C01165	FALSE	0	FALSE	--
	C01267	FALSE	0	FALSE	--
	C06007	FALSE	0	FALSE	--
	C00311	FALSE	0	FALSE	--
	C00232	FALSE	0	FALSE	--
	C04462	FALSE	0	FALSE	--
	C00197	TRUE	27	FALSE	--
	C03232	FALSE	0	FALSE	--
	C01005	FALSE	0	FALSE	--
	C00251	FALSE	0	FALSE	--
	C00254	FALSE	0	FALSE	--
	C01269	FALSE	0	FALSE	--
	C03175	TRUE	0	FALSE	--
	C00493	FALSE	0	FALSE	--
	C04823	FALSE	0	FALSE	--
	C04751	FALSE	0	FALSE	--
	C03406	TRUE	3.9	TRUE	Peptides
	C03082	FALSE	0	FALSE	--
	C00402	FALSE	0	TRUE	Peptides
	C00049	FALSE	0	TRUE	Peptides
	C02984	FALSE	0	FALSE	--
	C01638	FALSE	0	FALSE	--
	C00438	TRUE	0	FALSE	--
	C00337	TRUE	0	FALSE	--
	C00122	TRUE	4.9	FALSE	--
	C00327	TRUE	1.4	TRUE	Peptides
	C00179	FALSE	0	FALSE	--
	C01602	FALSE	0	FALSE	--
	C00134	TRUE	58	TRUE	Peptides
	C00062	FALSE	0	TRUE	Peptides
	C02163	FALSE	0	FALSE	--
	C01636	FALSE	0	FALSE	--
	C00086	TRUE	2.5	FALSE	--
	C03912	FALSE	0	FALSE	--
	C00763	FALSE	0	TRUE	Peptides
	C00148	FALSE	0	TRUE	Peptides
	C02702	FALSE	0	FALSE	--
	C01649	FALSE	0	FALSE	--
	C00437	TRUE	0.7	FALSE	--
	C00669	FALSE	0	FALSE	--
	C00666	TRUE	1.1	FALSE	--
	C00680	FALSE	0	FALSE	--
	C00047	FALSE	0	TRUE	Peptides
	C01931	FALSE	0	FALSE	--
	C01646	FALSE	0	FALSE	--
	C00993	TRUE	3.1	FALSE	--
	C04882	FALSE	0	FALSE	--
	C00692	FALSE	0	FALSE	--
	C04877	FALSE	0	FALSE	--
	C04421	FALSE	0	FALSE	--
	C04133	FALSE	0	FALSE	--
	C00624	TRUE	1.9	FALSE	--
	C00288	FALSE	0	FALSE	--
	C03284	FALSE	0	FALSE	--
	C05100	FALSE	0	FALSE	--
	C00439	FALSE	0	FALSE	--
	C00488	FALSE	0	FALSE	--
	C01100	FALSE	0	FALSE	--
	C03680	FALSE	0	FALSE	--
	C00860	TRUE	0	FALSE	--
	C00135	FALSE	0	TRUE	Peptides
	C02988	FALSE	0	FALSE	--
	C01643	FALSE	0	FALSE	--
	C00785	TRUE	6.1	FALSE	--
	C00857	FALSE	0	FALSE	--
	C00334	TRUE	3.4	TRUE	Peptides
	C03287	FALSE	0	FALSE	--
	C00217	FALSE	0	TRUE	Peptides
	C00025	FALSE	0	TRUE	Peptides
	C02987	FALSE	0	FALSE	--
	C01641	FALSE	0	FALSE	--
	C00407	FALSE	0	TRUE	Peptides
	C03127	FALSE	0	FALSE	--
	C01644	FALSE	0	FALSE	--
	C00123	FALSE	0	TRUE	Peptides
	C02047	FALSE	0	FALSE	--
	C01645	FALSE	0	FALSE	--
	C00826	FALSE	0	FALSE	--
	C00268	FALSE	0	FALSE	--
	C00079	FALSE	0	TRUE	Peptides
	C03511	FALSE	0	FALSE	--
	C01648	FALSE	0	FALSE	--
	C00272	FALSE	0	FALSE	--
	C00082	FALSE	0	TRUE	Peptides
	C00787	FALSE	0	FALSE	--
	C02839	FALSE	0	FALSE	--
	C00075	TRUE	0.6	TRUE	Nucleic acids
	C04376	FALSE	0	FALSE	--
	C04896	FALSE	0	FALSE	--
	C04916	FALSE	0	FALSE	--
	C01653	FALSE	0	FALSE	--
	C02554	FALSE	0	FALSE	--
	C00183	FALSE	0	TRUE	Peptides
Module 8	C04442	FALSE	0	FALSE	--
	C00345	TRUE	3.4	FALSE	--
	C00236	FALSE	0	FALSE	--
	C03506	FALSE	0	FALSE	--
	C00118	FALSE	0	FALSE	--
	C00111	TRUE	15	FALSE	--
	C00279	FALSE	0	FALSE	--
	C00231	FALSE	0	FALSE	--
	C01236	FALSE	0	FALSE	--
	C00498	FALSE	0	FALSE	--
	C00182	FALSE	0	FALSE	--
	C00103	TRUE	7	FALSE	--
	C00092	FALSE	0	FALSE	--
	C00085	TRUE	2.6	FALSE	--
	C05382	TRUE	4.2	FALSE	--
Module 9	C01302	FALSE	0	FALSE	--
	C01304	FALSE	0	FALSE	--
	C01268	FALSE	0	FALSE	--
	C04454	FALSE	0	FALSE	--
	C04732	FALSE	0	FALSE	--
	C04332	FALSE	0	FALSE	--
	C00061	FALSE	0	FALSE	--
	C00255	FALSE	0	TRUE	Vitamins and cofactors
	C15556	FALSE	0	FALSE	--
	C00058	FALSE	0	TRUE	Lipids
	C00199	FALSE	0	FALSE	--
	C00301	TRUE	0	FALSE	--
	C00117	TRUE	8.1	FALSE	--
	C00455	FALSE	0	FALSE	--
	C00153	TRUE	2.9	TRUE	Vitamins and cofactors
	C00442	FALSE	0	FALSE	--
	C03150	FALSE	0	FALSE	--
	C00121	FALSE	0	TRUE	Carbohydrates
	C00387	TRUE	5.3	TRUE	Nucleic acids
	C00144	TRUE	2	TRUE	Nucleic acids
	C00242	TRUE	9.9	TRUE	Nucleic acids
	C00262	TRUE	1.7	FALSE	--
	C00294	TRUE	400	FALSE	--
	C00130	TRUE	0	FALSE	--
	C05841	FALSE	0	FALSE	--
	C00253	TRUE	0	TRUE	Vitamins and cofactors
	C01185	FALSE	0	FALSE	--
	C03722	FALSE	0	FALSE	--
	C01762	FALSE	0	FALSE	--
	C04302	FALSE	0	FALSE	--
	C02741	FALSE	0	FALSE	--
	C02739	FALSE	0	FALSE	--
	C00119	FALSE	0	FALSE	--
	C00295	TRUE	0	FALSE	--
	C01103	FALSE	0	FALSE	--
	C00105	TRUE	1.5	TRUE	Nucleic acids
	C00015	TRUE	2.4	TRUE	Nucleic acids
	C00385	FALSE	0	FALSE	--
	C00655	TRUE	2.5	FALSE	--
	C00385	FALSE	0	FALSE	--
	C00655	TRUE	2.5	FALSE	--
