# Supplementary material for: Functional Modules, Structural Topology, and Optimal Activity in Metabolic Networks
Source: PLoS Comput Biol. 2012 Oct 11;8(10):e1002720. doi: 10.1371/journal.pcbi.1002720 (PMC3469419; doi:10.1371/journal.pcbi.1002720)
Supplement: Dataset S3 — Genome-scale metabolic reconstruction for Rhizobium etli ( iOR450 ). This file contains the entire set of biochemical reactions included in the metabolic reconstruction for R. etli. Overall, the metabolic reconstruction of R. etli is an integrated network of 402 reactions involving the participation of 450 genes and 377 metabolites. (XLSX) [file pcbi.1002720.s003.xlsx]

## Sheet: MetaboliReconstruction
Additional File 3. Genome-scale metabolic reconstruction for Rhizobium etli (iOR450)
Name	Reactants	Reversibility	Products		Lower bound (nmol/gDW/hr)	Upper bound (nmol/gDW/hr)	Genome Reaction Association
OF14e_Retli	akg[c] + arg-L[c] + asp-L[c] + cit[c] + cmp[c] + fum[c] + glycogen[c] + his-L[c] + lys-L[c] + mal-L[c] + phb[c] + ptrc[c] + trp-L[c] + ura[c] + val-L[c] + ala-L[e] + asp-L[e] + nh4[e]	->			0	1000
EX_ala-L(e)	ala-L[e]	<=>			0	1000
EX_asp-L(e)	asp-L[e]	<=>			0	1000
EX_co2(e)	co2[e]	<=>			-1	1000
EX_glu-L(e)		<=>	glu-L[e]		-0.02	0
EX_h(e)	h[e]	<=>			-1	1000
EX_h2o(e)	h2o[e]	<=>			-1	1000
EX_mal-L(e)		<=>	mal-L[e]		0	0
EX_n2(e)	n2[e]	<=>			-1	1000
EX_nh4(e)		<=>	nh4[e]		0	0
EX_o2(e)		<=>	o2[e]		-0.001	0
EX_pi(e)	pi[e]	<=>			-1	1000
EX_succ(e)		<=>	succ[e]		-1	0
sink_inost(c)		<=>	inost[c]		0	0
1ACPCE_Rhizobium	1acpr1cx[c] + h2o[c]	->	2obut[c] + h[c] + nh3[c]		-0.001	1
3AIBT	glu-L[c] + mmtsa[c]	<=>	3aib[c] + akg[c]		-1	1000	RHE_PF00434
AACOAT_1	acac[c] + atp[c] + coa[c]	->	aacoa[c] + amp[c] + ppi[c]		0	1000	RHE_CH00719
ABTA	4abut[c] + akg[c]	->	glu-L[c] + sucsal[c]		0	1000	RHE_CH00093
ACACT1r	2.000000 accoa[c]	<=>	aacoa[c] + coa[c]		-1	1000	( RHE_PF00014 or RHE_CH04018 or ( RHE_CH00558 and RHE_PE00203 ) )
ACGK	acglu[c] + atp[c]	->	acg5p[c] + adp[c]		0	1000	RHE_CH00428
ACGS	accoa[c] + glu-L[c]	->	acglu[c] + coa[c] + h[c]		0	1000	RHE_CH03768
ACLS_a	h[c] + pyr[c] + thmpp[c]	->	co2[c] + hethmpp[c]		0	1000	( RHE_PF00274 and RHE_CH02878 and RHE_CH02789 and RHE_CH02790 )
ACLS_b	hethmpp[c] + pyr[c]	->	alac-S[c] + thmpp[c]		0	1000	( RHE_PF00274 and RHE_CH02878 and RHE_CH02789 and RHE_CH02790 )
ACODA	acorn[c] + h2o[c]	->	ac[c] + orn[c]		0	1000	RHE_PF00335
ACONTa	cit[c]	<=>	acon-C[c] + h2o[c]		-1	1000	RHE_CH03944
ACONTb	acon-C[c] + h2o[c]	<=>	icit[c]		-1	1000	RHE_CH03944
ACOTA	acorn[c] + akg[c]	<=>	acg5sa[c] + glu-L[c]		-1	1000	RHE_CH00516
ACP1(FMN)	fmn[c] + h2o[c]	->	pi[c] + ribflv[c]		0	1000	RHE_CH01827
ACPS1	apoACP[c] + coa[c]	->	ACP[c] + h[c] + pap[c]		0	1000	RHE_CH01388
ACPpds	ACP[c] + h2o[c]	->	apoACP[c] + h[c] + pan4p[c]		0	1000	( RHE_CH01764 and RHE_PC00047 )
ADA	adn[c] + h[c] + h2o[c]	->	ins[c] + nh4[c]		0	1000	RHE_CH00197
ADD	ade[c] + h[c] + h2o[c]	->	hxan[c] + nh4[c]		0	1000	( RHE_CH03094 and RHE_CH03420 )
ADK1	amp[c] + atp[c]	<=>	2.000000 adp[c]		-1	1000	RHE_CH01696
ADKd	damp[c] + datp[c]	<=>	2.000000 dadp[c]		-1	1000	RHE_CH01696
ADNUC	adn[c] + h2o[c]	->	ade[c] + rib-D[c]		0	1000	RHE_CH02485
ADPRDP	adprib[c] + h2o[c]	->	amp[c] + 2.000000 h[c] + r5p[c]		0	1000	RHE_CH01485
ADPTr	ade[c] + prpp[c]	<=>	amp[c] + ppi[c]		-1	1000	( RHE_CH03800 or RHE_PD00341 or RHE_CH03035 )
ADSL1	dcamp[c]	->	amp[c] + fum[c]		0	1000	RHE_CH02273
ADSL2r	25aics[c]	<=>	aicar[c] + fum[c]		-1	1000	RHE_CH02273
ADSS	asp-L[c] + gtp[c] + imp[c]	->	dcamp[c] + gdp[c] + 2.000000 h[c] + pi[c]		0	1000	RHE_CH03344
AGMT	agm[c] + h2o[c]	->	ptrc[c] + urea[c]		0	1000	( RHE_CH01568 and RHE_CH02143 )
AGPR	acg5sa[c] + nadp[c] + pi[c]	<=>	acg5p[c] + h[c] + nadph[c]		-1	1000	RHE_CH01567
AHC	ahcys[c] + h2o[c]	<=>	adn[c] + hcys-L[c]		-1	1000	RHE_CH00031
AHCYSNS	ahcys[c] + h2o[c]	->	ade[c] + rhcys[c]		0	1000	RHE_CH00298
AICARTi	10fthf[c] + aicar[c]	->	fprica[c] + thf[c]		0	1000	RHE_CH04107
AIRCr	air[c] + co2[c]	<=>	5aizc[c] + h[c]		-1	1000	( RHE_CH03531 and RHE_CH03532 )
AKGDH	akg[c] + coa[c] + nad[c]	->	co2[c] + nadh[c] + succoa[c]		0	1000
ALAR	ala-L[c]	<=>	ala-D[c]		-1	1000	( RHE_CH01432 and RHE_PF00437 )
ALAS	gly[c] + h[c] + succoa[c]	->	5aop[c] + co2[c] + coa[c]		0	1000	RHE_PF00489
ALATRS	ala-L[c] + atp[c] + trnaala[c]	->	alatrna[c] + amp[c] + ppi[c]		0	1000	RHE_CH02322
ALAt2r	ala-L[e] + h[e]	<=>	ala-L[c] + h[c]		-1	1000
AMCPC	1acpr1cx[c] + ascb-L[c] + o2[c]	->	co2[c] + cyan[c] + dhdascb[c] + ethy[c] + 2.000000 h2o[c]		0	1000
AMID6	2oxgltrm[c] + h2o[c]	->	akg[c] + h[c] + nh4[c]		0	1000
AMPTASECG	cgly[c] + h2o[c]	->	cys-L[c] + gly[c]		0	1000	RHE_CH01298
AMPTASEPG	h2o[c] + progly[c]	->	gly[c] + pro-L[c]		0	1000	( RHE_PB00090 and RHE_CH01420 and RHE_CH02208 )
ANPRT	anth[c] + prpp[c]	->	ppi[c] + pran[c]		0	1000	RHE_CH02174
ANS	chor[c] + gln-L[c]	->	anth[c] + glu-L[c] + h[c] + pyr[c]		0	1000	RHE_CH03075
APRAUR	5apru[c] + h[c] + nadph[c]	->	5aprbu[c] + nadp[c]		0	1000	( RHE_PD00036 or RHE_CH01510 )
APS	aps[c] + 2.000000 gthrd[c]	<=>	amp[c] + gthox[c] + 2.000000 h[c] + so3[c]		-1	1000
ARGDr	arg-L[c] + h2o[c]	<=>	citr-L[c] + nh4[c]		-1	1000
ARGN	arg-L[c] + h2o[c]	->	orn[c] + urea[c]		0	1000	RHE_CH03851
ARGSL	argsuc[c]	<=>	arg-L[c] + fum[c]		-1	1000	RHE_CH03796
ARGSS	asp-L[c] + atp[c] + citr-L[c]	->	amp[c] + argsuc[c] + h[c] + ppi[c]		0	1000	RHE_CH03924
ARGTRS	arg-L[c] + atp[c] + trnaarg[c]	->	amp[c] + argtrna[c] + ppi[c]		0	1000	RHE_CH01818
AROH	Largn[c]	->	co2[c] + h2o[c] + phe-L[c]		0	1000	RHE_CH00131
ASADi	4pasp[c] + h[c] + nadph[c]	->	aspsa[c] + nadp[c] + pi[c]		0	1000	RHE_CH04100
ASDH	h[c] + nadh[c] + nh4[c] + oaa[c]	->	asp-L[c] + h2o[c] + nad[c]		0	1000
ASNS1_r	asp-L[c] + atp[c] + gln-L[c] + h2o[c]	<=>	amp[c] + asn-L[c] + glu-L[c] + h[c] + ppi[c]		-1	1000	RHE_CH00758
ASPCT	asp-L[c] + cbp[c]	->	cbasp[c] + h[c] + pi[c]		0	1000	RHE_CH01642
ASPKi	asp-L[c] + atp[c]	->	4pasp[c] + adp[c]		0	1000	RHE_CH03758
ASPR	asp-D[c]	<=>	asp-L[c]		-1	1000	RHE_CH02763
ASPTA	akg[c] + asp-L[c]	<=>	glu-L[c] + oaa[c]		-1	1000	( RHE_PC00186 and RHE_CH02998 and RHE_CH00568 and RHE_CH01873 and RHE_PF00273 )
ASPTRS	asp-L[c] + atp[c] + trnaasp[c]	->	amp[c] + asptrna[c] + ppi[c]		0	1000	RHE_CH01497
ASPT_rev	asp-L[c]	<=>	fum[c] + nh4[c]		-1	1000	RHE_PE00351
ASPt2r	asp-L[e] + h[e]	<=>	asp-L[c] + h[c]		-1	1000
ATPM	atp[c] + h2o[c]	->	adp[c] + h[c] + pi[c]		0	1000
ATPPRTr	atp[c] + prpp[c]	<=>	ppi[c] + prbatp[c]		-1	1000	RHE_CH00823
BDH	bhb[c] + nad[c]	<=>	acac[c] + h[c] + nadh[c]		-1	1000	RHE_CH03123
BUP	3uib[c] + 2.000000 h[c] + h2o[c]	->	3aib[c] + co2[c] + nh4[c]		0	1000	RHE_CH03290
CBMKr	atp[c] + co2[c] + nh4[c]	<=>	adp[c] + cbp[c] + 2.000000 h[c]		-1	1000
CBPS	2.000000 atp[c] + gln-L[c] + h2o[c] + hco3[c]	->	2.000000 adp[c] + cbp[c] + glu-L[c] + 2.000000 h[c] + pi[c]		0	1000	( RHE_CH02957 or RHE_CH02966 )
CHORM	chor[c]	->	pphn[c]		0	1000	RHE_CH03958
CHORS	3psme[c]	->	chor[c] + pi[c]		0	1000	RHE_CH00935
CO2t	co2[e]	<=>	co2[c]		-1	1000
CS	accoa[c] + h2o[c] + oaa[c]	->	cit[c] + coa[c] + h[c]		0	1000	( RHE_CH01926 or RHE_CH02183 )
CSND	csn[c] + h[c] + h2o[c]	->	nh4[c] + ura[c]		0	1000	( RHE_CH02043 or RHE_PB00107 )
CTPS2	atp[c] + gln-L[c] + h2o[c] + utp[c]	->	adp[c] + ctp[c] + glu-L[c] + 2.000000 h[c] + pi[c]		0	1000	RHE_CH02184
CYSS	acser[c] + h2s[c]	->	ac[c] + cys-L[c] + h[c]		0	1000	( RHE_CH00325 and RHE_CH01775 )
CYSTL	cyst-L[c] + h2o[c]	->	hcys-L[c] + nh4[c] + pyr[c]		0	1000	RHE_CH01899
CYSTRS	atp[c] + cys-L[c] + trnacys[c]	->	amp[c] + cystrna[c] + ppi[c]		0	1000	RHE_CH01425
CYSTS	hcys-L[c] + ser-L[c]	->	cyst-L[c] + h2o[c]		0	1000	RHE_CH01775
CYTD	cytd[c] + h[c] + h2o[c]	->	nh4[c] + uri[c]		0	1000	RHE_CH00191
CYTDH	cytd[c] + h2o[c]	->	csn[c] + rib-D[c]		0	1000
CYTK1	atp[c] + cmp[c]	<=>	adp[c] + cdp[c]		-1	1000	RHE_CH00098
CYTK11	dcmp[c] + dgtp[c]	<=>	dcdp[c] + dgdp[c]		-1	1000	RHE_CH00098
DADA	dad-2[c] + h[c] + h2o[c]	->	din[c] + nh4[c]		0	1000	RHE_CH00197
DAPDC	26dap-M[c] + h[c]	->	co2[c] + lys-L[c]		0	1000	RHE_CH03797
DAPE	26dap-LL[c]	<=>	26dap-M[c]		-1	1000	RHE_CH03955
DB4PS	ru5p-D[c]	->	db4p[c] + for[c] + h[c]		0	1000
DCTPD	dctp[c] + h[c] + h2o[c]	->	dutp[c] + nh4[c]		0	1000	RHE_CH00524
DCTPD2	ctp[c] + h[c] + h2o[c]	->	nh4[c] + utp[c]		0	1000	RHE_CH00524
DCYTD	dcyt[c] + h[c] + h2o[c]	->	duri[c] + nh4[c]		0	1000	RHE_CH00191
DDPA	e4p[c] + h2o[c] + pep[c]	->	2dda7p[c] + pi[c]		0	1000	( RHE_CH02375 and RHE_CH02369 )
DGK1	atp[c] + dgmp[c]	<=>	adp[c] + dgdp[c]		-1	1000	RHE_CH01448
DHAD1	23dhmb[c]	->	3mob[c] + h2o[c]		0	1000	( RHE_PC00044 and RHE_CH01704 and RHE_CH03160 and RHE_CH03347 )
DHAD2	23dhmp[c]	->	3mop[c] + h2o[c]		0	1000	( RHE_PC00044 and RHE_CH01704 and RHE_CH03160 and RHE_CH03347 )
DHDPRx	23dhdp[c] + h[c] + nadh[c]	->	nad[c] + thdp[c]		0	1000	RHE_CH00170
DHDPRy	23dhdp[c] + h[c] + nadph[c]	->	nadp[c] + thdp[c]		0	1000	RHE_CH00170
DHDPS	aspsa[c] + pyr[c]	->	23dhdp[c] + h[c] + 2.000000 h2o[c]		0	1000	( RHE_CH02792 or RHE_CH01381 or RHE_CH00606 or RHE_PF00398 or RHE_PF00094 or RHE_PC00042 )
DHORD	dhor-S[c] + o2[c]	<=>	h2o2[c] + orot[c]		-1	1000	( RHE_CH00540 and RHE_CH03278 )
DHORTS	dhor-S[c] + h2o[c]	<=>	cbasp[c] + h[c]		-1	1000	( RHE_CH03292 and RHE_CH00469 and RHE_CH00351 and RHE_CH01641 )
DHPM1	56dura[c] + h2o[c]	->	cala[c] + h[c]		0	1000	RHE_CH03292
DHPM2	56dthm[c] + h2o[c]	->	3uib[c] + h[c]		0	1000	RHE_CH03292
DHPPDA	25dhpp[c] + h[c] + h2o[c]	->	5apru[c] + nh4[c]		0	1000	RHE_CH01510
DHQD	3dhq[c]	<=>	3dhsk[c] + h2o[c]		-1	1000	( ( RHE_CH01871 and RHE_CH02289 ) or RHE_CH01931 )
DHQS	2dda7p[c]	->	3dhq[c] + pi[c]		0	1000	RHE_CH03825
DNAMTn2	amet[c] + dna[c]	->	ahcys[c] + dna5mtc[c] + h[c]		0	1000	RHE_PF00108
DPCOAK	atp[c] + dpcoa[c]	->	adp[c] + coa[c] + h[c]		0	1000	RHE_CH00004
DPR	2dhp[c] + h[c] + nadph[c]	->	nadp[c] + pant-R[c]		0	1000	RHE_CH01710
DTMPK	atp[c] + dtmp[c]	<=>	adp[c] + dtdp[c]		-1	1000	RHE_CH02160
DURAD2	56dthm[c] + nadp[c]	<=>	h[c] + nadph[c] + thym[c]		-1	1000
DURADx	56dura[c] + nad[c]	<=>	h[c] + nadh[c] + ura[c]		-1	1000
DURIK2	duri[c] + gtp[c]	->	dump[c] + gdp[c] + h[c]		0	1000	RHE_CH03084
DURIPP	duri[c] + pi[c]	<=>	2dr1p[c] + ura[c]		-1	1000	( RHE_CH00192 or RHE_CH00194 )
DUTPDP	dutp[c] + h2o[c]	->	dump[c] + h[c] + ppi[c]		0	1000	RHE_CH00330
ECOAH1	3hbcoa[c]	<=>	b2coa[c] + h2o[c]		-1	1000	( RHE_CH00356 and RHE_CH00559 and RHE_CH00571 and RHE_CH00906 and RHE_CH01573 and RHE_CH01721 and RHE_PF00542 )
EDA	2ddg6p[c]	->	g3p[c] + pyr[c]		0	1000	RHE_CH03635
EDD	6pgc[c]	->	2ddg6p[c] + h2o[c]		0	1000	RHE_CH00702
ENO	2pg[c]	<=>	h2o[c] + pep[c]		-1	1000	RHE_CH01931
FA05	atp[c] + 10.000000 coa[c] + eico[c] + 9.000000 fad[c] + 9.000000 h2o[c] + 9.000000 nad[c]	->	10.000000 accoa[c] + amp[c] + 9.000000 fadh2[c] + 9.000000 h[c] + 9.000000 nadh[c] + ppi[c]		0	1000
FACOAL160	atp[c] + coa[c] + hdca[c]	<=>	amp[c] + pmtcoa[c] + ppi[c]		-1	1000	( RHE_CH00478 and RHE_CH00921 and RHE_PF00013 )
FAO2	atp[c] + 8.000000 coa[c] + 7.000000 fad[c] + 7.000000 h2o[c] + hdca[c] + 7.000000 nad[c]	->	8.000000 accoa[c] + amp[c] + 7.000000 fadh2[c] + 7.000000 h[c] + 7.000000 nadh[c] + ppi[c]		0	1000
FAO3	atp[c] + 9.000000 coa[c] + 8.000000 fad[c] + 8.000000 h2o[c] + 8.000000 nad[c] + ocdca[c]	->	9.000000 accoa[c] + amp[c] + 8.000000 fadh2[c] + 8.000000 h[c] + 8.000000 nadh[c] + ppi[c]		0	1000
FAO7	atp[c] + 7.000000 coa[c] + 7.000000 fad[c] + 8.000000 h2o[c] + hpdca[c] + 7.000000 nad[c]	->	7.000000 accoa[c] + amp[c] + 7.000000 fadh2[c] + 8.000000 h[c] + 7.000000 nadh[c] + ppa[c] + ppi[c]		0	1000
FBP	fdp[c] + h2o[c]	->	f6p[c] + pi[c]		0	1000
FGLU	forglu[c] + h[c] + h2o[c]	->	frmd[c] + glu-L[c]		0	1000	RHE_PE00071
FMETTRS	10fthf[c] + mettrna[c]	->	fmettrna[c] + h[c] + thf[c]		0	1000	RHE_CH00414
FMNAT	atp[c] + fmn[c] + h[c]	->	fad[c] + ppi[c]		0	1000	RHE_CH00831
FRNDPRR	2.000000 fdred[c] + h[c] + nadp[c]	<=>	2.000000 fdox[c] + nadph[c]		-1	1000	RHE_CH02078
FUM	fum[c] + h2o[c]	<=>	mal-L[c]		-1	1000	( RHE_CH02385 or RHE_CH02383 )
G5SADr	glu5sa[c]	<=>	1pyr5c[c] + h[c] + h2o[c]		-1	1000
G5SD	glu5p[c] + h[c] + nadph[c]	->	glu5sa[c] + nadp[c] + pi[c]		0	1000	RHE_CH04069
G6PDH2	g6p[c] + nadp[c]	->	6pgl[c] + h[c] + nadph[c]		0	1000	( RHE_CH00704 or RHE_CH01185 )
GAPD	g3p[c] + nad[c] + pi[c]	<=>	13dpg[c] + h[c] + nadh[c]		-1	1000	RHE_CH03496
GARFTi	10fthf[c] + gar[c]	->	fgam[c] + h[c] + thf[c]		0	1000	RHE_CH01487
GDPT	gdptp[c] + h2o[c]	<=>	h[c] + pi[c] + ppgpp[c]		-1	1000	( RHE_CH00788 and RHE_CH01492 )
GF6PTA	f6p[c] + gln-L[c]	->	gam6p[c] + glu-L[c]		0	1000	( RHE_CH02091 and RHE_CH04036 )
GHMT2	ser-L[c] + thf[c]	->	gly[c] + h2o[c] + mlthf[c]		0	1000	RHE_CH01508
GK1	atp[c] + gmp[c]	<=>	adp[c] + gdp[c]		-1	1000	RHE_CH01448
GLCS1	adpglc[c]	->	adp[c] + glycogen[c] + h[c]		0	1000	RHE_CH03596
GLGC	atp[c] + g1p[c] + h[c]	->	adpglc[c] + ppi[c]		0	1000	RHE_CH03595
GLNS	atp[c] + glu-L[c] + nh4[c]	->	adp[c] + gln-L[c] + h[c] + pi[c]		0	1000	( RHE_CH00706 and RHE_CH02102 and RHE_CH02886 and RHE_CH03104 and RHE_PE00418 and RHE_CH01315 )
GLU5K	atp[c] + glu-L[c]	->	adp[c] + glu5p[c]		0	1000	RHE_CH04068
GLUCYS	atp[c] + cys-L[c] + glu-L[c]	->	adp[c] + glucys[c] + h[c] + pi[c]		0	1000	RHE_CH00803
GLUDC	glu-L[c] + h[c]	->	4abut[c] + co2[c]		0	1000
GLUN	gln-L[c] + h2o[c]	->	glu-L[c] + nh4[c]		0	1000	RHE_CH02311
GLUPRT	gln-L[c] + h2o[c] + prpp[c]	->	glu-L[c] + ppi[c] + pram[c]		0	1000	RHE_CH01428
GLUR	glu-D[c]	<=>	glu-L[c]		-1	1000	RHE_CH02314
GLUSy	akg[c] + gln-L[c] + h[c] + nadph[c]	->	2.000000 glu-L[c] + nadp[c]		0	1000
GLUTRS	atp[c] + glu-L[c] + trnaglu[c]	->	amp[c] + glutrna[c] + ppi[c]		0	1000	RHE_CH03656
GLUt2r	glu-L[e] + h[e]	<=>	glu-L[c] + h[c]		-1	1000
GLYAT	accoa[c] + gly[c]	<=>	2aobut[c] + coa[c]		-1	1000	( RHE_CH02952 or RHE_PF00489 )
GMPS2	atp[c] + gln-L[c] + h2o[c] + xmp[c]	->	amp[c] + glu-L[c] + gmp[c] + 2.000000 h[c] + ppi[c]		0	1000	RHE_CH00297
GND	6pgc[c] + nadp[c]	->	co2[c] + h[c] + nadph[c] + ru5p-D[c]		0	1000	( RHE_CH02468 and RHE_CH03488 )
GPAT_Rhizobium	gln-L[c] + h[c] + pyr[c]	<=>	2oxgltrm[c] + ala-L[c]		-1	1000
GTHOr	gthox[c] + h[c] + nadph[c]	<=>	2.000000 gthrd[c] + nadp[c]		-1	1000	RHE_CH02377
GTHP	2.000000 gthrd[c] + h2o2[c]	<=>	gthox[c] + 2.000000 h2o[c]		-1	1000	RHE_CH01597
GTHS	atp[c] + glucys[c] + gly[c]	->	adp[c] + gthrd[c] + h[c] + pi[c]		0	1000	RHE_CH00322
GTMLT	ala-L[c] + gthrd[c]	->	cgly[c] + gluala[c]		0	1000	( RHE_CH02146 and RHE_CH03536 )
GTPDPK	atp[c] + gtp[c]	->	amp[c] + gdptp[c] + h[c]		0	1000	RHE_CH01385
GTr_Retli	gln-L[c] + glx[c] + h[c]	<=>	2oxgltrm[c] + gly[c]		-1	1000
GUAD	gua[c] + h[c] + h2o[c]	->	nh4[c] + xan[c]		0	1000	RHE_CH03130
GUAPRTr	gua[c] + prpp[c]	<=>	gmp[c] + ppi[c]		-1	1000	( RHE_CH03800 or RHE_CH03035 or RHE_PD00341 )
H2Ot	h2o[e]	<=>	h2o[c]		-1	1000	RHE_PD00339
HACD1	aacoa[c] + h[c] + nadh[c]	<=>	3hbcoa[c] + nad[c]		-1	1000	( RHE_CH00559 and RHE_CH03794 and RHE_PC00067 and RHE_PC00126 )
HBDH	3hbb-RR[c] + h2o[c]	<=>	2.000000 bhb[c] + h[c]		-1	1000
HCYSMT	amet[c] + hcys-L[c]	->	ahcys[c] + h[c] + met-L[c]		0	1000	RHE_PC00163
HISD	his-L[c]	->	nh4[c] + urcan[c]		0	1000	( RHE_PE00072 and RHE_PE00081 )
HISTD	h2o[c] + histd[c] + 2.000000 nad[c]	->	3.000000 h[c] + his-L[c] + 2.000000 nadh[c]		0	1000	RHE_CH00581
HISTP	h2o[c] + hisp[c]	->	histd[c] + pi[c]		0	1000
HISTRS	atp[c] + his-L[c] + trnahis[c]	->	amp[c] + histrna[c] + ppi[c]		0	1000	RHE_CH00821
HSDy	hom-L[c] + nadp[c]	<=>	aspsa[c] + h[c] + nadph[c]		-1	1000	RHE_CH01878
HSK	atp[c] + hom-L[c]	->	adp[c] + h[c] + phom[c]		0	1000	RHE_CH00962
HSST	hom-L[c] + succoa[c]	->	coa[c] + suchms[c]		0	1000	RHE_CH04033
HSTPTr	glu-L[c] + imacp[c]	<=>	akg[c] + hisp[c]		-1	1000	( RHE_CH01331 and RHE_CH03810 and RHE_CH04010 and RHE_PD00233 )
HXPRTr	hxan[c] + prpp[c]	<=>	imp[c] + ppi[c]		-1	1000	RHE_CH03800
ICDHx	icit[c] + nad[c]	<=>	akg[c] + co2[c] + nadh[c]		-1	1000	RHE_CH02318
ICL	icit[c]	->	glx[c] + succ[c]		0	1000	RHE_CH00712
IG3PS	gln-L[c] + prlp[c]	->	aicar[c] + eig3p[c] + glu-L[c] + h[c]		0	1000
IGPDH	eig3p[c]	->	h2o[c] + imacp[c]		0	1000	RHE_CH00047
IGPS	2cpr5p[c] + h[c]	->	3ig3p[c] + co2[c] + h2o[c]		0	1000	RHE_CH02175
ILETAi	3mop[c] + glu-L[c]	->	akg[c] + ile-L[c]		0	1000	( RHE_CH01190 and RHE_CH02730 )
ILETRS	atp[c] + ile-L[c] + trnaile[c]	->	amp[c] + iletrna[c] + ppi[c]		0	1000	RHE_CH00832
IMPC	h2o[c] + imp[c]	<=>	fprica[c]		-1	1000	RHE_CH04107
IMPD	h2o[c] + imp[c] + nad[c]	->	h[c] + nadh[c] + xmp[c]		0	1000	RHE_CH00794
INS2D	inost[c] + nad[c]	->	2ins[c] + h[c] + nadh[c]		0	1000	( RHE_CH03170 and RHE_CH01209 )
INSCR	2ins[c] + atp[c]	->	adp[c] + dhap[c] + 2.000000 h[c] + msa[c]		0	1000
IPMDr	3c2hmp[c] + nad[c]	<=>	3c4mop[c] + h[c] + nadh[c]		-1	1000	RHE_CH04093
IPPMIa	3c2hmp[c]	<=>	2ippm[c] + h2o[c]		-1	1000	( RHE_CH03965 and RHE_CH04091 )
IPPMIb	2ippm[c] + h2o[c]	<=>	3c3hmp[c]		-1	1000	( RHE_CH03965 and RHE_CH04091 )
IPPS	3mob[c] + accoa[c] + h2o[c]	->	3c3hmp[c] + coa[c] + h[c]		0	1000	( RHE_CH01419 and RHE_CH03067 )
IZPN	4izp[c] + h2o[c]	->	forglu[c] + h[c]		0	1000	RHE_PE00073
KARA1	23dhmb[c] + nadp[c]	<=>	alac-S[c] + h[c] + nadph[c]		-1	1000	RHE_CH02744
KARA2	2ahbut[c] + h[c] + nadph[c]	<=>	23dhmp[c] + nadp[c]		-1	1000	RHE_CH02744
LEUTAi	4mop[c] + glu-L[c]	->	akg[c] + leu-L[c]		0	1000	( RHE_CH01190 and RHE_CH02730 )
LEUTRS	atp[c] + leu-L[c] + trnaleu[c]	->	amp[c] + leutrna[c] + ppi[c]		0	1000	RHE_CH04116
LYSTRS	atp[c] + lys-L[c] + trnalys[c]	->	amp[c] + lystrna[c] + ppi[c]		0	1000	( RHE_CH04041 and RHE_CH03657 )
MALS	accoa[c] + glx[c] + h2o[c]	->	coa[c] + h[c] + mal-L[c]		0	1000
MALS_rhizobia	accoa[c] + glx[c] + h2o[c]	<=>	coa[c] + h[c] + mal-L[c]		-1	1000	RHE_CH00052
MALt2_2	2.000000 h[e] + mal-L[e]	->	2.000000 h[c] + mal-L[c]		0	1000	RHE_CH02971
MCSNAH	5mcsn[c] + h[c] + h2o[c]	->	nh4[c] + thym[c]		0	1000	( RHE_PB00107 and RHE_CH02043 )
MDH	mal-L[c] + nad[c]	<=>	h[c] + nadh[c] + oaa[c]		-1	1000	( RHE_CH03891 and RHE_PF00366 and RHE_PF00428 )
METACH	achms[c] + h2s[c]	<=>	ac[c] + h[c] + hcys-L[c]		-1	1000	RHE_CH01577
METAT	atp[c] + h2o[c] + met-L[c]	->	amet[c] + pi[c] + ppi[c]		0	1000	RHE_CH00370
METB1r	achms[c] + cys-L[c]	<=>	ac[c] + cyst-L[c] + h[c]		-1	1000	( RHE_CH00522 or RHE_PF00461 or RHE_PE00244 or RHE_PF00019 )
METS	5mthf[c] + hcys-L[c]	->	h[c] + met-L[c] + thf[c]		0	1000	RHE_CH02901
METTRS	atp[c] + met-L[c] + trnamet[c]	->	amp[c] + mettrna[c] + ppi[c]		0	1000	( RHE_CH02157 or RHE_PD00315 or RHE_CH03014 )
MMSAD3	coa[c] + msa[c] + nad[c]	->	accoa[c] + co2[c] + nadh[c]		0	1000	RHE_CH00731
MOHMT	3mob[c] + h2o[c] + mlthf[c]	->	2dhp[c] + thf[c]		0	1000	( RHE_PF00002 and RHE_PE00443 )
N2tr	n2[e]	<=>	n2[c]		-1	1000
NADS2	atp[c] + dnad[c] + gln-L[c] + h2o[c]	->	amp[c] + glu-L[c] + h[c] + nad[c] + ppi[c]		0	1000	( RHE_CH02371 and RHE_CH01195 )
NADTRHD	nad[c] + nadph[c]	->	nadh[c] + nadp[c]		0	1000	( RHE_CH01846 or RHE_CH01651 )
NAPRTr	h[c] + nac[c] + prpp[c]	<=>	nicrnt[c] + ppi[c]		-1	1000	RHE_CH00181
NDP8	dudp[c] + h2o[c]	->	dump[c] + h[c] + pi[c]		0	1000	RHE_CH02160
NDPK1	atp[c] + gdp[c]	<=>	adp[c] + gtp[c]		-1	1000	RHE_CH01472
NDPK2	atp[c] + udp[c]	<=>	adp[c] + utp[c]		-1	1000	RHE_CH01472
NDPK3	atp[c] + cdp[c]	<=>	adp[c] + ctp[c]		-1	1000	RHE_CH01472
NDPK4	atp[c] + dtdp[c]	<=>	adp[c] + dttp[c]		-1	1000	RHE_CH01472
NDPK5	atp[c] + dgdp[c]	<=>	adp[c] + dgtp[c]		-1	1000	RHE_CH01472
NDPK6	atp[c] + dudp[c]	<=>	adp[c] + dutp[c]		-1	1000	RHE_CH01472
NDPK7	atp[c] + dcdp[c]	<=>	adp[c] + dctp[c]		-1	1000	RHE_CH01472
NH3c	h[c] + nh3[c]	<=>	nh4[c]		0	1000
NH3e	nh4[e]	<=>	h[e] + nh3[e]		-1	1000
NH3t	nh3[e]	<=>	nh3[c]		-1	1000
NIT	16.000000 atp[c] + 6.000000 fdred[c] + 16.000000 h2o[c] + n2[c]	->	16.000000 adp[c] + 6.000000 fdox[c] + 8.000000 h[c] + 2.000000 nh3[c] + 16.000000 pi[c]		0	1000	( RHE_PD00307 and RHE_PD00201 and RHE_PD00308 and RHE_PD00260 and RHE_PD00202 and RHE_PD00306 and RHE_PD00200 )
NMNATr	atp[c] + h[c] + nmn[c]	<=>	nad[c] + ppi[c]		-1	1000	RHE_CH04070
NMNN	h2o[c] + nmn[c]	->	h[c] + ncam[c] + r5p[c]		0	1000	RHE_CH02485
NNAM	h2o[c] + ncam[c]	->	nac[c] + nh4[c]		0	1000	RHE_CH02821
NNATr	atp[c] + h[c] + nicrnt[c]	<=>	dnad[c] + ppi[c]		-1	1000	RHE_CH04070
NNDPR	2.000000 h[c] + prpp[c] + quln[c]	->	co2[c] + nicrnt[c] + ppi[c]		0	1000	RHE_PE00439
NP1_r	h[c] + nac[c] + r1p[c]	<=>	nicrns[c] + pi[c]		-1	1000	RHE_CH00192
NT5C	h2o[c] + nicrnt[c]	->	nicrns[c] + pi[c]		0	1000	RHE_CH03555
NTD10	h2o[c] + xmp[c]	->	pi[c] + xtsn[c]		0	1000	RHE_CH03555
NTD11	h2o[c] + imp[c]	->	ins[c] + pi[c]		0	1000	RHE_CH03555
NTD2	h2o[c] + ump[c]	->	pi[c] + uri[c]		0	1000	RHE_CH03555
NTD3	dcmp[c] + h2o[c]	->	dcyt[c] + pi[c]		0	1000	RHE_CH03555
NTD4	cmp[c] + h2o[c]	->	cytd[c] + pi[c]		0	1000	RHE_CH03555
NTD5	dtmp[c] + h2o[c]	->	pi[c] + thymd[c]		0	1000	RHE_CH03555
NTD5_a	h2o[c] + nmn[c]	->	pi[c] + rnam[c]		0	1000	RHE_CH03555
NTD6r	damp[c] + h2o[c]	<=>	dad-2[c] + pi[c]		-1	1000	RHE_CH03555
NTD7	amp[c] + h2o[c]	->	adn[c] + pi[c]		0	1000	RHE_CH03555
NTD8	dgmp[c] + h2o[c]	->	dgsn[c] + pi[c]		0	1000	RHE_CH03555
NTD9	gmp[c] + h2o[c]	->	gsn[c] + pi[c]		0	1000	RHE_CH03555
NTPTP1	dgtp[c] + h2o[c]	->	dgsn[c] + pppi[c]		0	1000	RHE_CH01817
O2t	o2[e]	<=>	o2[c]		-1	1000
OCBTi	cbp[c] + orn[c]	->	citr-L[c] + h[c] + pi[c]		0	1000
OCOAT1r	acac[c] + succoa[c]	<=>	aacoa[c] + succ[c]		-1	1000	( RHE_PE00201 and RHE_PE00202 )
OMCDC	3c4mop[c] + h[c]	->	4mop[c] + co2[c]		0	1000
OMPDC	h[c] + orot5p[c]	->	co2[c] + ump[c]		0	1000	RHE_CH00314
OORr	akg[c] + coa[c] + 2.000000 fdox[c]	<=>	co2[c] + 2.000000 fdred[c] + h[c] + succoa[c]		-1	1000	RHE_CH03888
ORNCD	orn[c]	->	nh4[c] + pro-L[c]		0	1000	( RHE_CH00058 and RHE_CH02026 and RHE_PF00181 )
ORNDC	h[c] + orn[c]	->	co2[c] + ptrc[c]		0	1000	RHE_CH03629
ORNTAC	acorn[c] + glu-L[c]	<=>	acglu[c] + orn[c]		-1	1000	RHE_CH03768
ORNTAr	akg[c] + orn[c]	<=>	glu-L[c] + glu5sa[c]		-1	1000	RHE_CH03852
ORPT	orot5p[c] + ppi[c]	<=>	orot[c] + prpp[c]		-1	1000	RHE_CH00474
PANTS	ala-B[c] + atp[c] + pant-R[c]	->	amp[c] + h[c] + pnto-R[c] + ppi[c]		0	1000	RHE_PF00001
PC	atp[c] + hco3[c] + pyr[c]	->	adp[c] + h[c] + oaa[c] + pi[c]		0	1000	RHE_CH04002
PDH	coa[c] + nad[c] + pyr[c]	->	accoa[c] + co2[c] + nadh[c]		0	1000	( RHE_CH01935 and RHE_CH01933 and RHE_CH01934 )
PFK	atp[c] + f6p[c]	->	adp[c] + fdp[c] + h[c]		0	1000	RHE_CH02862
PGCDr	3pg[c] + nad[c]	<=>	3php[c] + h[c] + nadh[c]		-1	1000	( RHE_CH03454 and RHE_PF00379 )
PGI	g6p[c]	<=>	f6p[c]		-1	1000	RHE_CH00477
PGK	3pg[c] + atp[c]	<=>	13dpg[c] + adp[c]		-1	1000	RHE_CH03499
PGL	6pgl[c] + h2o[c]	->	6pgc[c] + h[c]		0	1000	RHE_CH00703
PGMT	g1p[c]	<=>	g6p[c]		-1	1000	RHE_CH03597
PHBS	3hbcoa-R[c]	->	coa[c] + phb[c]		0	1000
PHB_deg_1	h2o[c] + 2.000000 phb[c]	->	3hbb-RR[c] + h[c]		0	1000
PHETA1	akg[c] + phe-L[c]	<=>	glu-L[c] + phpyr[c]		-1	1000	( RHE_CH01331 and RHE_CH03810 and RHE_CH04010 )
PHETHPTOX	o2[c] + phe-L[c] + thbpt[c]	->	dhbpt[c] + h2o[c] + tyr-L[c]		0	1000	RHE_CH01742
PHETRS	atp[c] + phe-L[c] + trnaphe[c]	->	amp[c] + phetrna[c] + ppi[c]		0	1000	( RHE_CH00263 and RHE_CH00264 )
PHPB	aacoa[c] + h[c] + nadph[c]	<=>	3hbcoa-R[c] + nadp[c]		-1	1000	RHE_CH04019
PIt	pi[c]	<=>	pi[e]		-1	1000
PMDPHT	5aprbu[c] + h2o[c]	->	4r5au[c] + pi[c]		0	1000
PNCDC	h[c] + ptcys[c]	->	co2[c] + ptth[c]		0	1000	RHE_CH00040
PNP	pi[c] + rnam[c]	<=>	h[c] + ncam[c] + r1p[c]		-1	1000	RHE_CH00192
PNTK	atp[c] + pnto-R[c]	->	4ppan[c] + adp[c] + h[c]		0	1000	RHE_CH00040
PPA	h2o[c] + ppi[c]	->	h[c] + 2.000000 pi[c]		0	1000
PPCDC	4ppcys[c] + h[c]	->	co2[c] + pan4p[c]		0	1000	RHE_CH00342
PPCK	atp[c] + oaa[c]	->	adp[c] + co2[c] + pep[c]		0	1000	RHE_CH00037
PPGPPDP	h2o[c] + ppgpp[c]	->	gdp[c] + ppi[c]		0	1000	RHE_CH01385
PPMi	r5p[c]	->	r1p[c]		0	1000	( RHE_CH00198 or RHE_CH03597 )
PPNCL3	4ppan[c] + atp[c] + cys-L[c]	->	4ppcys[c] + amp[c] + h[c] + ppi[c]		0	1000	RHE_CH00342
PPNDHr	h[c] + pphn[c]	<=>	co2[c] + h2o[c] + phpyr[c]		-1	1000	RHE_CH00131
PRAGS	atp[c] + gly[c] + pram[c]	->	adp[c] + gar[c] + h[c] + pi[c]		0	1000	RHE_CH00886
PRAI	pran[c]	<=>	2cpr5p[c]		-1	1000	RHE_CH00020
PRAIS	atp[c] + fpram[c]	->	adp[c] + air[c] + 2.000000 h[c] + pi[c]		0	1000	RHE_CH01488
PRAMPC	h2o[c] + prbamp[c]	->	prfp[c]		0	1000	( RHE_CH00041 and RHE_CH02202 )
PRASCS	5aizc[c] + asp-L[c] + atp[c]	<=>	25aics[c] + adp[c] + h[c] + pi[c]		-1	1000	( RHE_CH02278 and RHE_CH03409 )
PRATPP	h2o[c] + prbatp[c]	->	h[c] + ppi[c] + prbamp[c]		0	1000	RHE_CH00041
PRFGS	atp[c] + fgam[c] + gln-L[c] + h2o[c]	->	adp[c] + fpram[c] + glu-L[c] + h[c] + pi[c]		0	1000	( RHE_CH02286 and RHE_CH02281 )
PRMICIi	prfp[c]	->	prlp[c]		0	1000	RHE_CH00043
PROL_RA	pro-L[c]	->	pro-D[c]		0	1000	RHE_PF00391
PROTRS	atp[c] + pro-L[c] + trnapro[c]	->	amp[c] + ppi[c] + protrna[c]		0	1000	RHE_CH01623
PRPPSi	atp[c] + r5p[c]	->	amp[c] + h[c] + prpp[c]		0	1000	RHE_CH03023
PSCVT	pep[c] + skm5p[c]	<=>	3psme[c] + pi[c]		-1	1000	RHE_CH00884
PSD-Rhizobium	h[c] + ps[c]	->	co2[c] + pe[c]		0	1000	RHE_CH01411
PSERTr	3php[c] + glu-L[c]	<=>	akg[c] + pser-L[c]		-1	1000	RHE_CH03455
PSP_L	h2o[c] + pser-L[c]	->	pi[c] + ser-L[c]		0	1000	RHE_CH02794
PSSYNi	cdpdag[c] + ser-L[c]	->	cmp[c] + 2.000000 h[c] + ps[c]		0	1000	RHE_CH01410
PTHK	atp[c] + ptth[c]	->	adp[c] + h[c] + pan4p[c]		0	1000	RHE_CH00040
PTPAT	atp[c] + h[c] + pan4p[c]	<=>	dpcoa[c] + ppi[c]		-1	1000	RHE_CH02113
PUNP1	adn[c] + pi[c]	<=>	ade[c] + r1p[c]		-1	1000	RHE_CH00192
PUNP2	dad-2[c] + pi[c]	<=>	2dr1p[c] + ade[c]		-1	1000	RHE_CH00192
PUNP3	gsn[c] + pi[c]	<=>	gua[c] + r1p[c]		-1	1000	RHE_CH00192
PUNP4	dgsn[c] + pi[c]	<=>	2dr1p[c] + gua[c]		-1	1000	RHE_CH00192
PUNP5	ins[c] + pi[c]	<=>	hxan[c] + r1p[c]		-1	1000	RHE_CH00192
PUNP6	din[c] + pi[c]	<=>	2dr1p[c] + hxan[c]		-1	1000	RHE_CH00192
PUNP7	pi[c] + xtsn[c]	<=>	r1p[c] + xan[c]		-1	1000	RHE_CH00192
PYK	adp[c] + h[c] + pep[c]	->	atp[c] + pyr[c]		0	1000	RHE_CH03542
PYOPT	dadp[c] + h[c] + pep[c]	<=>	datp[c] + pyr[c]		-1	1000	RHE_CH03542
PYPRTr	prpp[c] + xan[c]	<=>	ppi[c] + xmp[c]		-1	1000	RHE_CH03800
RBFK	atp[c] + ribflv[c]	->	adp[c] + fmn[c] + h[c]		0	1000	RHE_CH00831
RBFSa	4r5au[c] + db4p[c]	->	dmlz[c] + 2.000000 h2o[c] + pi[c]		0	1000
RBFSb	2.000000 dmlz[c]	->	4r5au[c] + ribflv[c]		0	1000	( RHE_CH01511 and RHE_CH01525 and RHE_CH02688 )
RBKr	atp[c] + rib-D[c]	<=>	adp[c] + h[c] + r5p[c]		-1	1000	( RHE_PC00098 or RHE_CH00409 )
RNDR3	cdp[c] + trdrd[c]	->	dcdp[c] + h2o[c] + trdox[c]		0	1000
RPE	ru5p-D[c]	<=>	xu5p-D[c]		0	1000	RHE_CH02270
RPI	r5p[c]	<=>	ru5p-D[c]		-1	1000	( RHE_CH02380 and RHE_PF00039 )
SADT	atp[c] + h[c] + so4[c]	->	aps[c] + ppi[c]		0	1000	( RHE_CH01131 and RHE_CH01130 )
SDPDS	h2o[c] + sl26da[c]	->	26dap-LL[c] + succ[c]		0	1000	RHE_CH00417
SDPTA	akg[c] + sl26da[c]	<=>	glu-L[c] + sl2a6o[c]		-1	1000	( RHE_PD00118 and RHE_CH01877 )
SERATi	accoa[c] + ser-L[c]	->	acser[c] + coa[c]		0	1000	( RHE_CH01903 and RHE_CH03627 )
SERD_Lr	ser-L[c]	<=>	nh4[c] + pyr[c]		-1	1000	( RHE_CH02214 or RHE_CH04092 or RHE_PF00182 or RHE_CH02027 or RHE_CH03537 or RHE_CH01759 )
SERTRS	atp[c] + ser-L[c] + trnaser[c]	->	amp[c] + ppi[c] + sertrna[c]		0	1000	( RHE_CH01826 and RHE_CH04045 )
SHK3Dr	3dhsk[c] + h[c] + nadph[c]	<=>	nadp[c] + skm[c]		-1	1000	( RHE_PC00214 and RHE_CH00003 and RHE_CH02291 )
SHKK	atp[c] + skm[c]	->	adp[c] + h[c] + skm5p[c]		0	1000	RHE_CH03826
SHSL1	cys-L[c] + suchms[c]	->	cyst-L[c] + h[c] + succ[c]		0	1000	( RHE_PF00461 or RHE_PE00244 or RHE_PF00019 or ( RHE_PE00244 and RHE_PF00019 and RHE_CH00522 and RHE_PF00461 ) )
SHSL4r	h2o[c] + suchms[c]	<=>	2obut[c] + h[c] + nh4[c] + succ[c]		-1	1000	( RHE_CH00522 or RHE_PF00019 or RHE_PF00461 or RHE_PE00244 )
SHSly_2	hs-[c] + suchms[c]	<=>	hcys-L[c] + succ[c]		-1	1000	( RHE_CH00522 or RHE_PF00461 or RHE_PE00244 or RHE_PF00019 )
SSALy	h2o[c] + nadp[c] + sucsal[c]	->	2.000000 h[c] + nadph[c] + succ[c]		0	1000	( RHE_PC00032 and RHE_CH00092 and RHE_PF00340 and RHE_PF00364 and RHE_PF00201 )
SSHy_Rhizobium	h[c] + hs-[c] + ser-L[c]	->	cys-L[c] + h2o[c]		0	1000	RHE_CH01775
SUCCt2_2	2.000000 h[e] + succ[e]	->	2.000000 h[c] + succ[c]		0	1000	RHE_CH02971
SUCD1	fad[c] + succ[c]	<=>	fadh2[c] + fum[c]		-1	1000	( RHE_CH03895 and RHE_CH03894 and RHE_CH03897 and RHE_CH03896 )
SUCD3	fadh2[c] + q[c]	<=>	fad[c] + qh2[c]		-1	1000
SUCOAS	atp[c] + coa[c] + succ[c]	<=>	adp[c] + pi[c] + succoa[c]		-1	1000	( RHE_CH03889 or RHE_CH03890 )
SULRi	5.000000 h[c] + 3.000000 nadph[c] + so3[c]	->	3.000000 h2o[c] + h2s[c] + 3.000000 nadp[c]		0	1000	RHE_CH01960
TALA	g3p[c] + s7p[c]	<=>	e4p[c] + f6p[c]		-1	1000	RHE_CH03667
THD2	nadh[c] + nadp[c] + 2.000000 h[e]	->	2.000000 h[c] + nad[c] + nadph[c]		0	1000	( RHE_CH03612 and RHE_CH03613 and RHE_CH03611 )
THDPS	h2o[c] + succoa[c] + thdp[c]	->	coa[c] + sl2a6o[c]		0	1000	RHE_CH00418
THRA2r	athr-L[c]	<=>	acald[c] + gly[c]		-1	1000	RHE_CH03568
THRAr	thr-L[c]	<=>	acald[c] + gly[c]		-1	1000	RHE_CH03568
THRD	nad[c] + thr-L[c]	->	2aobut[c] + h[c] + nadh[c]		0	1000	RHE_CH02951
THRD_L	thr-L[c]	->	2obut[c] + nh4[c]		0	1000	( RHE_CH04092 or RHE_CH03537 or RHE_CH02027 or RHE_CH01759 or RHE_PF00182 )
THRS	h2o[c] + phom[c]	->	pi[c] + thr-L[c]		0	1000	( RHE_CH00979 or RHE_CH04092 )
THRTRS	atp[c] + thr-L[c] + trnathr[c]	->	amp[c] + ppi[c] + thrtrna[c]		0	1000	RHE_CH02196
TKT1	r5p[c] + xu5p-D[c]	<=>	g3p[c] + s7p[c]		-1	1000	( RHE_CH03495 and RHE_CH02397 and RHE_CH02398 )
TKT2	e4p[c] + xu5p-D[c]	<=>	f6p[c] + g3p[c]		-1	1000	( RHE_CH03495 and RHE_CH02397 and RHE_CH02398 )
TMDK1	atp[c] + thymd[c]	->	adp[c] + dtmp[c] + h[c]		0	1000	RHE_CH03084
TMDPP	pi[c] + thymd[c]	<=>	2dr1p[c] + thym[c]		-1	1000	RHE_CH00194
TMDS	dump[c] + mlthf[c]	->	dhf[c] + dtmp[c]		0	1000	RHE_CH02799
TPI	dhap[c]	<=>	g3p[c]		-1	1000	( RHE_CH02186 and RHE_PF00040 )
TRDRr	h[c] + nadph[c] + trdox[c]	<=>	nadp[c] + trdrd[c]		-1	1000	( RHE_CH02975 and RHE_PF00137 )
TRPS1r	3ig3p[c] + ser-L[c]	<=>	g3p[c] + h2o[c] + trp-L[c]		-1	1000	RHE_CH00021
TRPS2	indole[c] + ser-L[c]	->	h2o[c] + trp-L[c]		0	1000	RHE_CH00021
TRPS3r	3ig3p[c]	<=>	g3p[c] + indole[c]		-1	1000	RHE_CH00021
TRPTRS	atp[c] + trnatrp[c] + trp-L[c]	->	amp[c] + ppi[c] + trptrna[c]		0	1000	RHE_CH00383
TYRTA	akg[c] + tyr-L[c]	<=>	34hpp[c] + glu-L[c]		-1	1000	( ( RHE_PC00186 and RHE_CH02998 and RHE_CH00568 and RHE_CH01873 and RHE_PF00273 ) or ( RHE_CH01331 and RHE_CH03810 and RHE_CH04010 ) )
TYRTRS	atp[c] + trnatyr[c] + tyr-L[c]	->	amp[c] + ppi[c] + tyrtrna[c]		0	1000	RHE_CH02258
UAAGDS	26dap-M[c] + atp[c] + uamag[c]	->	adp[c] + h[c] + pi[c] + ugmd[c]		0	1000	RHE_CH02852
UGMDDS	alaala[c] + atp[c] + ugmd[c]	->	adp[c] + h[c] + pi[c] + ugmda[c]		0	1000	RHE_CH02851
UMPK	atp[c] + ump[c]	<=>	adp[c] + udp[c]		-1	1000	RHE_CH00098
UPPN	cala[c] + 2.000000 h[c] + h2o[c]	->	ala-B[c] + co2[c] + nh4[c]		0	1000	RHE_CH03290
UPPRTr	prpp[c] + ura[c]	<=>	ppi[c] + ump[c]		-1	1000	RHE_CH00196
URCN	h2o[c] + urcan[c]	->	4izp[c]		0	1000	( RHE_PE00070 or RHE_CH00347 )
UREA	2.000000 h[c] + h2o[c] + urea[c]	->	co2[c] + 2.000000 nh4[c]		0	1000	( RHE_CH03310 and RHE_CH03308 and RHE_CH03305 )
VALTAi	3mob[c] + glu-L[c]	->	akg[c] + val-L[c]		0	1000	( RHE_CH01190 and RHE_CH02730 )
VALTRS	atp[c] + trnaval[c] + val-L[c]	->	amp[c] + ppi[c] + valtrna[c]		0	1000	RHE_CH01811
XPPT	prpp[c] + xan[c]	->	ppi[c] + xmp[c]		0	1000	RHE_CH03800
ilvg	2obut[c] + hethmpp[c]	->	2ahbut[c] + thmpp[c]		0	1000	( RHE_PF00274 and RHE_CH02878 and RHE_CH02789 and RHE_CH02790 )
ACH	b2coa[c] + fadh2[c]	<=>	fad[c] + btcoa[c]		-1	1000	RHE_CH00557 and RHE_CH00905 and RHE_CH04044 and RHE_PC00127
ACH2	accoa[c] + fadh2[c] + h[c] + nadh[c] + btcoa[c]	<=>	coa[c] + fad[c] + h2o[c] + nad[c] + hxcoa[c]		-1	1000	RHE_CH00558 and RHE_CH04018 and RHE_PC00068 and RHE_PF00014 and RHE_CH00559 and RHE_PC00067 and RHE_PC00126 and RHE_CH00356 and RHE_CH00559 and RHE_CH00571 and RHE_CH00906 and RHE_CH01573 and RHE_CH01721 and RHE_PF00542 and RHE_CH00557 and RHE_CH00905 and RHE_CH04044 and RHE_PC00127
ACH3	accoa[c] + fadh2[c] + h[c] + nadh[c] + hxcoa[c]	<=>	coa[c] + fad[c] + h2o[c] + nad[c] + otcoa[c]		-1	1000	RHE_CH00558 and RHE_CH04018 and RHE_PC00068 and RHE_PF00014 and RHE_CH00559 and RHE_PC00067 and RHE_PC00126 and RHE_CH00356 and RHE_CH00559 and RHE_CH00571 and RHE_CH00906 and RHE_CH01573 and RHE_CH01721 and RHE_PF00542 and RHE_CH00557 and RHE_CH00905 and RHE_CH04044 and RHE_PC00127
DM_otcoa[c]		<=>	otcoa[c]		-0.1	1000	RHE_CH00312 and RHE_CH01602 and RHE_CH01603 and RHE_CH01604 and RHE_CH01606 and RHE_CH01608 and RHE_CH01609 and RHE_CH01610 and RHE_CH01611 and RHE_CH01612 and RHE_CH01613 and RHE_CH01614 and RHE_CH01615 and RHE_CH01616 and RHE_CH01617 and RHE_CH01618 and RHE_CH02557 and RHE_CH02760 and RHE_CH03729 and RHE_CH03730 and RHE_CH03734 and RHE_CH03735 and RHE_CH03736 and RHE_CH03737 and RHE_CH03738 and…
ACH4	accoa[c] + fadh2[c] + h[c] + nadh[c] + otcoa[c]	<=>	coa[c] + fad[c] + h2o[c] + nad[c] + decoa[c]		-1	1000	RHE_CH00558 and RHE_CH04018 and RHE_PC00068 and RHE_PF00014 and RHE_CH00559 and RHE_PC00067 and RHE_PC00126 and RHE_CH00356 and RHE_CH00559 and RHE_CH00571 and RHE_CH00906 and RHE_CH01573 and RHE_CH01721 and RHE_PF00542 and RHE_CH00557 and RHE_CH00905 and RHE_CH04044 and RHE_PC00127
DM_decoa[c]		<=>	decoa[c]		-0.1	1000	RHE_CH00312 and RHE_CH01602 and RHE_CH01603 and RHE_CH01604 and RHE_CH01606 and RHE_CH01608 and RHE_CH01609 and RHE_CH01610 and RHE_CH01611 and RHE_CH01612 and RHE_CH01613 and RHE_CH01614 and RHE_CH01615 and RHE_CH01616 and RHE_CH01617 and RHE_CH01618 and RHE_CH02557 and RHE_CH02760 and RHE_CH03729 and RHE_CH03730 and RHE_CH03734 and RHE_CH03735 and RHE_CH03736 and RHE_CH03737 and RHE_CH03738 and…
ACH5	accoa[c] + fadh2[c] + h[c] + nadh[c] + decoa[c]	<=>	coa[c] + fad[c] + h2o[c] + nad[c] + dodecoa[c]		-1	1000	RHE_CH00558 and RHE_CH04018 and RHE_PC00068 and RHE_PF00014 and RHE_CH00559 and RHE_PC00067 and RHE_PC00126 and RHE_CH00356 and RHE_CH00559 and RHE_CH00571 and RHE_CH00906 and RHE_CH01573 and RHE_CH01721 and RHE_PF00542 and RHE_CH00557 and RHE_CH00905 and RHE_CH04044 and RHE_PC00127
DM_dodecoa[c]		<=>	dodecoa[c]		-1	1000	RHE_CH00312 and RHE_CH01602 and RHE_CH01603 and RHE_CH01604 and RHE_CH01606 and RHE_CH01608 and RHE_CH01609 and RHE_CH01610 and RHE_CH01611 and RHE_CH01612 and RHE_CH01613 and RHE_CH01614 and RHE_CH01615 and RHE_CH01616 and RHE_CH01617 and RHE_CH01618 and RHE_CH02557 and RHE_CH02760 and RHE_CH03729 and RHE_CH03730 and RHE_CH03734 and RHE_CH03735 and RHE_CH03736 and RHE_CH03737 and RHE_CH03738 and…
ACH6	accoa[c] + fadh2[c] + h[c] + nadh[c] + dodecoa[c]	<=>	coa[c] + fad[c] + h2o[c] + nad[c] + tetdcoa[c]		-1	1000	RHE_CH00558 and RHE_CH04018 and RHE_PC00068 and RHE_PF00014 and RHE_CH00559 and RHE_PC00067 and RHE_PC00126 and RHE_CH00356 and RHE_CH00559 and RHE_CH00571 and RHE_CH00906 and RHE_CH01573 and RHE_CH01721 and RHE_PF00542 and RHE_CH00557 and RHE_CH00905 and RHE_CH04044 and RHE_PC00127
DM_tetdcoa[c]		<=>	tetdcoa[c]		-0.1	1000	RHE_CH00312 and RHE_CH01602 and RHE_CH01603 and RHE_CH01604 and RHE_CH01606 and RHE_CH01608 and RHE_CH01609 and RHE_CH01610 and RHE_CH01611 and RHE_CH01612 and RHE_CH01613 and RHE_CH01614 and RHE_CH01615 and RHE_CH01616 and RHE_CH01617 and RHE_CH01618 and RHE_CH02557 and RHE_CH02760 and RHE_CH03729 and RHE_CH03730 and RHE_CH03734 and RHE_CH03735 and RHE_CH03736 and RHE_CH03737 and RHE_CH03738 and…
ACH7	accoa[c] + fadh2[c] + h[c] + nadh[c] + tetdcoa[c]	<=>	coa[c] + fad[c] + h2o[c] + nad[c] + pmtcoa[c]		-1	1000	RHE_CH00558 and RHE_CH04018 and RHE_PC00068 and RHE_PF00014 and RHE_CH00559 and RHE_PC00067 and RHE_PC00126 and RHE_CH00356 and RHE_CH00559 and RHE_CH00571 and RHE_CH00906 and RHE_CH01573 and RHE_CH01721 and RHE_PF00542 and RHE_CH00557 and RHE_CH00905 and RHE_CH04044 and RHE_PC00127
DM_pmtcoa[c]		<=>	pmtcoa[c]		-0.1	1000
NADH (Rhizobium)	5.000000 h[c] + nadh[c] + q[c]	<=>	nad[c] + qh2[c] + 4.000000 h[e]		-1	1000	RHE_CH00312 and RHE_CH01602 and RHE_CH01603 and RHE_CH01604 and RHE_CH01606 and RHE_CH01608 and RHE_CH01609 and RHE_CH01610 and RHE_CH01611 and RHE_CH01612 and RHE_CH01613 and RHE_CH01614 and RHE_CH01615 and RHE_CH01616 and RHE_CH01617 and RHE_CH01618 and RHE_CH02557 and RHE_CH02760 and RHE_CH03729 and RHE_CH03730 and RHE_CH03734 and RHE_CH03735 and RHE_CH03736 and RHE_CH03737 and RHE_CH03738 and…
CYTOX	4.000000 h[c] + o2[c] + 2.000000 qh2[c]	<=>	2.000000 h2o[c] + 2.000000 q[c] + 4.000000 h[e]		-1	1000	RHE_CH03036 and RHE_CH03037 and RHE_CH03038
CYTOX2	2.000000 h[c] + o2[c] + 2.000000 qh2[c]	<=>	2.000000 h2o[c] + 2.000000 q[c] + 2.000000 h[e]		-1	1000	RHE_PF00507 and RHE_PF00506 and RHE_PF00505 and RHE_PF00504 and RHE_PD00296 and RHE_PD00295 and RHE_PD00294 and RHE_PD00293 and RHE_PB00065 and RHE_PB00064 and RHE_CH02617 and RHE_CH02616 and RHE_CH02615 and RHE_CH02614 and RHE_CH00983 and RHE_CH00982 and RHE_CH00956 and RHE_CH00953 and RHE_CH00952
DM_hisp[c]		->	hisp[c]		0	1000	NA
LASPOX	asp-L[c] + h2o[c] + o2[c]	<=>	h2o2[c] + nh3[c] + oaa[c]		-1	1000	RHE_PE00440
ATPS2	adp[c] + pi[c]	->	atp[c] + h[c] + h2o[c]		0	1000	RHE_CH00864 and RHE_CH00865 and RHE_CH00866 and RHE_CH00867 and RHE_CH03869 and RHE_CH03870 and RHE_CH03871 and RHE_CH03872 and RHE_CH03873
GLYTRS	atp[c] + gly[c] + trnagly[c]	<=>	amp[c] + ppi[c] + glytrna[c]		-1	1000	RHE_CH00890 and RHE_CH00881
HCO3E	co2[c] + h2o[c]	<=>	h[c] + hco3[c]		-1	1000	RHE_CH01064 and RHE_CH04103 and RHE_PD00192
FBA	fdp[c]	<=>	dhap[c] + g3p[c]		-1	1000	RHE_CH03500 and RHE_PB00072
PGM	2pg[c]	<=>	3pg[c]		-1	1000	RHE_CH00169 and RHE_CH00893 and RHE_CH00937 and RHE_CH02353 and RHE_CH03439 and RHE_PF00323
PRO1x	nad[c] + pro-L[c]	->	1pyr5c[c] + 2.000000 h[c] + nadh[c]		0	1000	RHE_CH03015 and RHE_PF00430
ALAD_R	ala-L[c] + h2o[c] + nad[c]	<=>	h[c] + nadh[c] + nh3[c] + pyr[c]		-1	1000	RHE_CH01770

## Sheet: Metabolite notation
Metabolic notation.
Abreviation	Name
'10fthf[c]'	'10-Formyltetrahydrofolate'
'13dpg[c]'	'3-Phospho-D-glyceroyl phosphate'
'1acpr1cx[c]'	'1-Aminocyclopropane-1-carboxylate'
'1pyr5c[c]'	'1-Pyrroline-5-carboxylate'
'23dhdp[c]'	'2,3-Dihydrodipicolinate'
'23dhmb[c]'	'(R)-2,3-Dihydroxy-3-methylbutanoate'
'23dhmp[c]'	'(R)-2,3-Dihydroxy-3-methylpentanoate'
'25aics[c]'	'(S)-2-[5-Amino-1-(5-phospho-D-ribosyl)imidazole-4-carboxamido]succinate'
'25dhpp[c]'	'2,5-Diamino-6-hydroxy-4-(5'-phosphoribosylamino)-pyrimidine'
'26dap-LL[c]'	'LL-2,6-Diaminoheptanedioate'
'26dap-M[c]'	'meso-2,6-Diaminoheptanedioate'
'2ahbut[c]'	'(S)-2-Aceto-2-hydroxybutanoate'
'2aobut[c]'	'L-2-Amino-3-oxobutanoate'
'2cpr5p[c]'	'1-(2-Carboxyphenylamino)-1-deoxy-D-ribulose 5-phosphate'
'2dda7p[c]'	'2-Dehydro-3-deoxy-D-arabino-heptonate 7-phosphate'
'2ddg6p[c]'	'2-Dehydro-3-deoxy-D-gluconate 6-phosphate'
'2dhp[c]'	'2-Dehydropantoate'
'2dr1p[c]'	'2-Deoxy-D-ribose 1-phosphate'
'2ins[c]'	'2-Inosose'
'2ippm[c]'	'2-Isopropylmaleate'
'2obut[c]'	'2-Oxobutanoate'
'2oxgltrm[c]'	'2-Oxoglutaramate'
'2pg[c]'	'D-Glycerate 2-phosphate'
'34hpp[c]'	'3-(4-Hydroxyphenyl)pyruvate'
'3aib[c]'	'L-3-Amino-isobutanoate'
'3c2hmp[c]'	'3-Carboxy-2-hydroxy-4-methylpentanoate'
'3c3hmp[c]'	'3-Carboxy-3-hydroxy-4-methylpentanoate'
'3c4mop[c]'	'3-Carboxy-4-methyl-2-oxopentanoate'
'3dhq[c]'	'3-Dehydroquinate'
'3dhsk[c]'	'3-Dehydroshikimate'
'3hbb-RR[c]'	'(R)-3-((R)-3-Hydroxybutanoyloxy)butanoate'
'3hbcoa[c]'	'(S)-3-Hydroxybutanoyl-CoA'
'3hbcoa-R[c]'	'(R)-3-Hydroxybutanoyl-CoA'
'3ig3p[c]'	'C'-(3-Indolyl)-glycerol 3-phosphate'
'3mob[c]'	'3-Methyl-2-oxobutanoate'
'3mop[c]'	'(S)-3-Methyl-2-oxopentanoate'
'3pg[c]'	'3-Phospho-D-glycerate'
'3php[c]'	'3-Phosphohydroxypyruvate'
'3psme[c]'	'5-O-(1-Carboxyvinyl)-3-phosphoshikimate'
'3uib[c]'	'3-Ureidoisobutyrate'
'4abut[c]'	'4-Aminobutanoate'
'4izp[c]'	'4-Imidazolone-5-propanoate'
'4mop[c]'	'4-Methyl-2-oxopentanoate'
'4pasp[c]'	'4-Phospho-L-aspartate'
'4ppan[c]'	'D-4'-Phosphopantothenate'
'4ppcys[c]'	'N-((R)-4-Phosphopantothenoyl)-L-cysteine'
'4r5au[c]'	'4-(1-D-Ribitylamino)-5-aminouracil'
'56dthm[c]'	'5,6-Dihydrothymine'
'56dura[c]'	'5,6-dihydrouracil'
'5aizc[c]'	'5-amino-1-(5-phospho-D-ribosyl)imidazole-4-carboxylate'
'5aop[c]'	'5-Amino-4-oxopentanoate'
'5aprbu[c]'	'5-Amino-6-(5'-phosphoribitylamino)uracil'
'5apru[c]'	'5-Amino-6-(5'-phosphoribosylamino)uracil'
'5mcsn[c]'	'5-Methylcytosine'
'5mthf[c]'	'5-Methyltetrahydrofolate'
'6pgc[c]'	'6-Phospho-D-gluconate'
'6pgl[c]'	'6-phospho-D-glucono-1,5-lactone'
'ACP[c]'	'acyl carrier protein'
'Largn[c]'	'L-Arogenate'
'aacoa[c]'	'Acetoacetyl-CoA'
'ac[c]'	'Acetate'
'acac[c]'	'Acetoacetate'
'acald[c]'	'Acetaldehyde'
'accoa[c]'	'Acetyl-CoA'
'acg5p[c]'	'N-Acetyl-L-glutamyl 5-phosphate'
'acg5sa[c]'	'N-Acetyl-L-glutamate 5-semialdehyde'
'acglu[c]'	'N-Acetyl-L-glutamate'
'achms[c]'	'O-Acetyl-L-homoserine'
'acon-C[c]'	'cis-Aconitate'
'acorn[c]'	'N2-Acetyl-L-ornithine'
'acser[c]'	'O-Acetyl-L-serine'
'ade[c]'	'Adenine'
'adn[c]'	'Adenosine'
'adp[c]'	'ADP'
'adpglc[c]'	'ADPglucose'
'adprib[c]'	'ADPribose'
'agm[c]'	'Agmatine'
'ahcys[c]'	'S-Adenosyl-L-homocysteine'
'aicar[c]'	'5-Amino-1-(5-Phospho-D-ribosyl)imidazole-4-carboxamide'
'air[c]'	'5-amino-1-(5-phospho-D-ribosyl)imidazole'
'akg[c]'	'2-Oxoglutarate'
'ala-B[c]'	'beta-Alanine'
'ala-D[c]'	'D-Alanine'
'ala-L[c]'	'L-Alanine'
'alaala[c]'	'D-Alanyl-D-alanine'
'alac-S[c]'	'(S)-2-Acetolactate'
'alatrna[c]'	'L-Alanyl-tRNA(Ala)'
'amet[c]'	'S-Adenosyl-L-methionine'
'amp[c]'	'AMP'
'anth[c]'	'Anthranilate'
'apoACP[c]'	'apoprotein [acyl carrier protein]'
'aps[c]'	'Adenosine 5'-phosphosulfate'
'arg-L[c]'	'L-Arginine'
'argsuc[c]'	'N(omega)-(L-Arginino)succinate'
'argtrna[c]'	'L-Arginyl-tRNA(Arg)'
'ascb-L[c]'	'L-Ascorbate'
'asn-L[c]'	'L-Asparagine'
'asp-D[c]'	'D-Aspartate'
'asp-L[c]'	'L-Aspartate'
'aspsa[c]'	'L-Aspartate 4-semialdehyde'
'asptrna[c]'	'L-Aspartyl-tRNA(Asp)'
'athr-L[c]'	'L-Allo-threonine'
'atp[c]'	'ATP'
'b2coa[c]'	'Crotonoyl-CoA'
'bhb[c]'	'(R)-3-Hydroxybutanoate'
'cala[c]'	'N-Carbamoyl-beta-alanine'
'cbasp[c]'	'N-Carbamoyl-L-aspartate'
'cbp[c]'	'Carbamoyl phosphate'
'cdp[c]'	'CDP'
'cdpdag[c]'	'CDPdiacylglycerol'
'cgly[c]'	'Cys-Gly'
'chor[c]'	'chorismate'
'cit[c]'	'Citrate'
'citr-L[c]'	'L-Citrulline'
'cmp[c]'	'CMP'
'co2[c]'	'CO2'
'coa[c]'	'Coenzyme A'
'csn[c]'	'Cytosine'
'ctp[c]'	'CTP'
'cyan[c]'	'Hydrogen cyanide'
'cys-L[c]'	'L-Cysteine'
'cyst-L[c]'	'L-Cystathionine'
'cystrna[c]'	'L-Cysteinyl-tRNA(Cys)'
'cytd[c]'	'Cytidine'
'dad-2[c]'	'Deoxyadenosine'
'dadp[c]'	'dADP'
'damp[c]'	'dAMP'
'datp[c]'	'dATP'
'db4p[c]'	'3,4-dihydroxy-2-butanone 4-phosphate'
'dcamp[c]'	'N6-(1,2-Dicarboxyethyl)-AMP'
'dcdp[c]'	'dCDP'
'dcmp[c]'	'dCMP'
'dctp[c]'	'dCTP'
'dcyt[c]'	'Deoxycytidine'
'dgdp[c]'	'dGDP'
'dgmp[c]'	'dGMP'
'dgsn[c]'	'Deoxyguanosine'
'dgtp[c]'	'dGTP'
'dhap[c]'	'Dihydroxyacetone phosphate'
'dhbpt[c]'	'6,7-Dihydrobiopterin'
'dhdascb[c]'	'Dehydroascorbate'
'dhf[c]'	'7,8-Dihydrofolate'
'dhor-S[c]'	'(S)-Dihydroorotate'
'din[c]'	'Deoxyinosine'
'dmlz[c]'	'6,7-Dimethyl-8-(1-D-ribityl)lumazine'
'dna[c]'	'DNA'
'dna5mtc[c]'	'DNA 5-methylcytosine'
'dnad[c]'	'Deamino-NAD+'
'dpcoa[c]'	'Dephospho-CoA'
'dtdp[c]'	'dTDP'
'dtmp[c]'	'dTMP'
'dttp[c]'	'dTTP'
'dudp[c]'	'dUDP'
'dump[c]'	'dUMP'
'duri[c]'	'Deoxyuridine'
'dutp[c]'	'dUTP'
'e4p[c]'	'D-Erythrose 4-phosphate'
'eico[c]'	'Eicosanoate'
'eig3p[c]'	'D-erythro-1-(Imidazol-4-yl)glycerol 3-phosphate'
'ethy[c]'	'Ethylene'
'f6p[c]'	'D-Fructose 6-phosphate'
'fad[c]'	'Flavin adenine dinucleotide oxidized'
'fadh2[c]'	'Flavin adenine dinucleotide reduced'
'fdox[c]'	'ferredoxin (oxidized) 2[4Fe-4S]'
'fdp[c]'	'D-Fructose 1,6-bisphosphate'
'fdred[c]'	'ferredoxin (reduced) 2[4Fe-4S]'
'fgam[c]'	'N2-Formyl-N1-(5-phospho-D-ribosyl)glycinamide'
'fmettrna[c]'	'N-Formylmethionyl-tRNA'
'fmn[c]'	'FMN'
'for[c]'	'Formate'
'forglu[c]'	'N-Formimidoyl-L-glutamate'
'fpram[c]'	'2-(Formamido)-N1-(5-phospho-D-ribosyl)acetamidine'
'fprica[c]'	'5-Formamido-1-(5-phospho-D-ribosyl)imidazole-4-carboxamide'
'frmd[c]'	'Formamide'
'fum[c]'	'Fumarate'
'g1p[c]'	'D-Glucose 1-phosphate'
'g3p[c]'	'Glyceraldehyde 3-phosphate'
'g6p[c]'	'D-Glucose 6-phosphate'
'gam6p[c]'	'D-Glucosamine 6-phosphate'
'gar[c]'	'N1-(5-Phospho-D-ribosyl)glycinamide'
'gdp[c]'	'GDP'
'gdptp[c]'	'Guanosine 3'-diphosphate 5'-triphosphate'
'gln-L[c]'	'L-Glutamine'
'glu-D[c]'	'D-Glutamate'
'glu-L[c]'	'L-Glutamate'
'glu5p[c]'	'L-Glutamate 5-phosphate'
'glu5sa[c]'	'L-Glutamate 5-semialdehyde'
'gluala[c]'	'5-L-Glutamyl-L-alanine'
'glucys[c]'	'gamma-L-Glutamyl-L-cysteine'
'glutrna[c]'	'L-Glutamyl-tRNA(Glu)'
'glx[c]'	'Glyoxylate'
'gly[c]'	'Glycine'
'glycogen[c]'	'glycogen'
'gmp[c]'	'GMP'
'gsn[c]'	'Guanosine'
'gthox[c]'	'Oxidized glutathione'
'gthrd[c]'	'Reduced glutathione'
'gtp[c]'	'GTP'
'gua[c]'	'Guanine'
'h[c]'	'H+'
'h2o[c]'	'H2O'
'h2o2[c]'	'Hydrogen peroxide'
'h2s[c]'	'Hydrogen sulfide'
'hco3[c]'	'Bicarbonate'
'hcys-L[c]'	'L-Homocysteine'
'hdca[c]'	'Hexadecanoate (n-C16:0)'
'hethmpp[c]'	'Hydroxy ethyl Thiamin diphosphate'
'his-L[c]'	'L-Histidine'
'hisp[c]'	'L-Histidinol phosphate'
'histd[c]'	'L-Histidinol'
'histrna[c]'	'L-Histidyl-tRNA(His)'
'hom-L[c]'	'L-Homoserine'
'hpdca[c]'	'heptadecanoate'
'hs-[c]'	'sulfide'
'hxan[c]'	'Hypoxanthine'
'icit[c]'	'Isocitrate'
'ile-L[c]'	'L-Isoleucine'
'iletrna[c]'	'L-Isoleucyl-tRNA(Ile)'
'imacp[c]'	'3-(Imidazol-4-yl)-2-oxopropyl phosphate'
'imp[c]'	'IMP'
'indole[c]'	'Indole'
'inost[c]'	'myo-Inositol'
'ins[c]'	'Inosine'
'leu-L[c]'	'L-Leucine'
'leutrna[c]'	'L-Leucyl-tRNA(Leu)'
'lys-L[c]'	'L-Lysine'
'lystrna[c]'	'L-Lysine-tRNA (Lys)'
'mal-L[c]'	'L-Malate'
'met-L[c]'	'L-Methionine'
'mettrna[c]'	'L-Methionyl-tRNA (Met)'
'mlthf[c]'	'5,10-Methylenetetrahydrofolate'
'mmtsa[c]'	'(S)-Methylmalonate semialdehyde'
'msa[c]'	'Malonate semialdehyde'
'n2[c]'	'nitrogen'
'nac[c]'	'Nicotinate'
'nad[c]'	'Nicotinamide adenine dinucleotide'
'nadh[c]'	'Nicotinamide adenine dinucleotide - reduced'
'nadp[c]'	'Nicotinamide adenine dinucleotide phosphate'
'nadph[c]'	'Nicotinamide adenine dinucleotide phosphate - reduced'
'ncam[c]'	'Nicotinamide'
'nh3[c]'	'Ammonia'
'nh4[c]'	'Ammonium'
'nicrns[c]'	'Nicotinate D-ribonucleoside'
'nicrnt[c]'	'Nicotinate D-ribonucleotide'
'nmn[c]'	'NMN'
'o2[c]'	'O2'
'oaa[c]'	'Oxaloacetate'
'ocdca[c]'	'octadecanoate (n-C18:0)'
'orn[c]'	'Ornithine'
'orot[c]'	'Orotate'
'orot5p[c]'	'Orotidine 5'-phosphate'
'pan4p[c]'	'Pantetheine 4'-phosphate'
'pant-R[c]'	'(R)-Pantoate'
'pap[c]'	'Adenosine 3',5'-bisphosphate'
'pe[c]'	'Phosphatidylethanolamine'
'pep[c]'	'Phosphoenolpyruvate'
'phb[c]'	'poly-b-hydroxybutyrate'
'phe-L[c]'	'L-Phenylalanine'
'phetrna[c]'	'L-Phenylalanyl-tRNA(Phe)'
'phom[c]'	'O-Phospho-L-homoserine'
'phpyr[c]'	'Phenylpyruvate'
'pi[c]'	'Phosphate'
'pmtcoa[c]'	'Palmitoyl-CoA (n-C16:0CoA)'
'pnto-R[c]'	'(R)-Pantothenate'
'ppa[c]'	'Propionate (n-C3:0)'
'ppgpp[c]'	'Guanosine 3',5'-bis(diphosphate)'
'pphn[c]'	'Prephenate'
'ppi[c]'	'Diphosphate'
'pppi[c]'	'Inorganic triphosphate'
'pram[c]'	'5-Phospho-beta-D-ribosylamine'
'pran[c]'	'N-(5-Phospho-D-ribosyl)anthranilate'
'prbamp[c]'	'1-(5-Phosphoribosyl)-AMP'
'prbatp[c]'	'1-(5-Phosphoribosyl)-ATP'
'prfp[c]'	[1x87 char]
'prlp[c]'	[1x100 char]
'pro-D[c]'	'D-Proline'
'pro-L[c]'	'L-Proline'
'progly[c]'	'L-Prolinylglycine'
'protrna[c]'	'L-Prolyl-tRNA(Pro)'
'prpp[c]'	'5-Phospho-alpha-D-ribose 1-diphosphate'
'ps[c]'	'Phosphatidylserine'
'pser-L[c]'	'O-Phospho-L-serine'
'ptcys[c]'	'N-Pantothenoylcysteine'
'ptrc[c]'	'Putrescine'
'ptth[c]'	'Pantetheine'
'pyr[c]'	'Pyruvate'
'q[c]'	'Ubiquinone'
'qh2[c]'	'Ubiquinol'
'quln[c]'	'Quinolinate'
'r1p[c]'	'alpha-D-Ribose 1-phosphate'
'r5p[c]'	'alpha-D-Ribose 5-phosphate'
'rhcys[c]'	'S-Ribosyl-L-homocysteine'
'rib-D[c]'	'D-Ribose'
'ribflv[c]'	'Riboflavin'
'rnam[c]'	'N-Ribosylnicotinamide'
'ru5p-D[c]'	'D-Ribulose 5-phosphate'
's7p[c]'	'Sedoheptulose 7-phosphate'
'ser-L[c]'	'L-Serine'
'sertrna[c]'	'L-Seryl-tRNA(Ser)'
'skm[c]'	'Shikimate'
'skm5p[c]'	'Shikimate 5-phosphate'
'sl26da[c]'	'N-Succinyl-LL-2,6-diaminoheptanedioate'
'sl2a6o[c]'	'N-Succinyl-2-L-amino-6-oxoheptanedioate'
'so3[c]'	'Sulfite'
'so4[c]'	'Sulfate'
'succ[c]'	'Succinate'
'succoa[c]'	'Succinyl-CoA'
'suchms[c]'	'O-Succinyl-L-homoserine'
'sucsal[c]'	'Succinic semialdehyde'
'thbpt[c]'	'Tetrahydrobiopterin'
'thdp[c]'	'2,3,4,5-Tetrahydrodipicolinate'
'thf[c]'	'5,6,7,8-Tetrahydrofolate'
'thmpp[c]'	'Thiamine diphosphate'
'thr-L[c]'	'L-Threonine'
'thrtrna[c]'	'L-Threonyl-tRNA(Thr)'
'thym[c]'	'Thymine'
'thymd[c]'	'Thymidine'
'trdox[c]'	'Oxidized thioredoxin'
'trdrd[c]'	'Reduced thioredoxin'
'trnaala[c]'	'tRNA(Ala)'
'trnaarg[c]'	'tRNA(Arg)'
'trnaasp[c]'	'tRNA(Asp)'
'trnacys[c]'	'tRNA(Cys)'
'trnaglu[c]'	'tRNA (Glu)'
'trnahis[c]'	'tRNA(His)'
'trnaile[c]'	'tRNA(Ile)'
'trnaleu[c]'	'tRNA(Leu)'
'trnalys[c]'	'tRNA(Lys)'
'trnamet[c]'	'tRNA(Met)'
'trnaphe[c]'	'tRNA(Phe)'
'trnapro[c]'	'tRNA(Pro)'
'trnaser[c]'	'tRNA(Ser)'
'trnathr[c]'	'tRNA(Thr)'
'trnatrp[c]'	'tRNA(Trp)'
'trnatyr[c]'	'tRNA(Tyr)'
'trnaval[c]'	'tRNA(Val)'
'trp-L[c]'	'L-Tryptophan'
'trptrna[c]'	'L-Tryptophanyl-tRNA(Trp)'
'tyr-L[c]'	'L-Tyrosine'
'tyrtrna[c]'	'L-Tyrosyl-tRNA(Tyr)'
'uamag[c]'	'UDP-N-acetylmuramoyl-L-alanyl-D-glutamate'
'udp[c]'	'UDP'
'ugmd[c]'	'UDP-N-acetylmuramoyl-L-alanyl-D-gamma-glutamyl-meso-2,6-diaminopimelate'
'ugmda[c]'	[1x84 char]
'ump[c]'	'UMP'
'ura[c]'	'Uracil'
'urcan[c]'	'Urocanate'
'urea[c]'	'Urea'
'uri[c]'	'Uridine'
'utp[c]'	'UTP'
'val-L[c]'	'L-Valine'
'valtrna[c]'	'L-Valyl-tRNA(Val)'
'xan[c]'	'Xanthine'
'xmp[c]'	'Xanthosine 5'-phosphate'
'xtsn[c]'	'Xanthosine'
'xu5p-D[c]'	'D-Xylulose 5-phosphate'
'ala-L[e]'	'L-Alanine'
'asp-L[e]'	'L-Aspartate'
'co2[e]'	'CO2'
'glu-L[e]'	'L-Glutamate'
'h[e]'	'H+'
'h2o[e]'	'H2O'
'mal-L[e]'	'L-Malate'
'n2[e]'	'nitrogen'
'nh3[e]'	'Ammonia'
'nh4[e]'	'Ammonium'
'o2[e]'	'O2'
'pi[e]'	'Phosphate'
'succ[e]'	'Succinate'
'btcoa[c]'	''
'hxcoa[c]'	''
'otcoa[c]'	''
'decoa[c]'	''
'dodecoa[c]'	''
'tetdcoa[c]'	''
'trnagly[c]'	''
'glytrna[c]'	''
